# Supplementary material for: Integrated transcriptomic and neuroimaging brain model decodes biological mechanisms in aging and Alzheimer’s disease
Source: eLife. 2021 May 18;10:e62589. doi: 10.7554/eLife.62589 (PMC8131100; doi:10.7554/eLife.62589)
Supplement: Figure 1—figure supplement 2—source data 1. [file elife-62589-fig1-figsupp2-data1.xlsx]

## Sheet: Sheet1
Pearson Correlation
0.479701
0.551184
0.61433
0.410898
0.595254
0.749746
0.473502
0.665558
0.553376
0.61086
0.553721
0.50646
0.618231
0.61438
0.530683
0.445037
0.38384
0.740732
0.518619
0.409712
0.59363
0.572432
0.703248
0.710105
0.568283
0.582286
0.562478
0.609963
0.599561
0.536689
0.59542
0.332971
0.672422
0.65982
0.633868
0.734658
0.568949
0.550793
0.643041
0.511484
0.506717
0.490048
0.6795
0.266529
0.557288
0.356857
0.645954
0.740151
0.524749
0.439201
0.760176
0.527196
0.66309
0.47787
0.682593
0.520029
0.813311
0.47464
0.578848
0.351498
0.50588
0.432079
0.362097
0.445997
0.671683
0.585602
0.724676
0.44855
0.564885
0.637922
0.319802
0.455989
0.665602
0.588272
0.447468
0.338202
0.447719
0.646009
0.356158
0.54518
0.645197
0.604827
0.560251
0.575814
0.650824
0.512677
0.491389
0.8948
0.597272
0.470156
0.404068
0.471272
0.477122
0.657588
0.41752
0.469514
0.642013
0.534255
0.699791
0.539319
0.602056
0.715318
0.536266
0.360967
0.528271
0.646653
0.415885
0.39594
0.577295
0.50056
0.663837
0.654306
0.640077
0.496934
0.564289
0.510555
0.493924
0.668454
0.581698
0.42982
0.537192
0.266966
0.612319
0.689982
0.573087
0.778739
0.476685
0.267799
0.10127
0.491534
0.528931
0.56927
0.727387
0.493353
0.390022
0.517752
0.467344
0.626616
0.728819
0.710439
0.678269
0.429511
0.465192
0.58774
0.644
0.648171
0.516008
0.818668
0.701145
0.661714
0.390594
0.800096
0.607889
0.53614
0.676638
0.538548
0.91108
0.557993
0.550685
0.552046
0.485773
0.82922
0.42545
0.481452
0.486059
0.539342
0.350828
0.441353
0.476724
0.80467
0.532538
0.522591
0.402241
0.629339
0.609966
0.667483
0.509836
0.450208
0.61358
0.520972
0.527181
0.593173
0.641619
0.720577
0.708102
0.69512
0.510056
0.536705
0.52352
0.543732
0.483059
0.412242
0.648289
0.353813
0.442724
0.562737
0.580178
0.615142
0.483287
0.53896
0.674793
0.63611
0.813724
0.379919
0.543008
0.499413
0.50991
0.534821
0.738408
0.555075
0.742785
0.624675
0.621244
0.347455
0.395147
0.778975
0.388549
0.486387
0.50424
0.393923
0.653739
0.669644
0.587379
0.487783
0.521034
0.801935
0.457937
0.554628
0.646333
0.503009
0.451496
0.385323
0.792285
0.620409
0.623096
0.68954
0.656383
0.782511
0.609141
0.72265
0.528728
0.500013
0.763617
0.706828
0.654074
0.795767
0.565584
0.421191
0.6376
0.56938
0.568491
0.923498
0.507285
0.739201
0.509125
0.437581
0.307762
0.25397
0.476213
0.824049
0.423823
0.544371
0.602544
0.509453
0.736786
0.627898
0.696389
0.589115
0.611176
0.646858
0.658727
0.534506
0.495919
0.526785
0.688454
0.383312
0.609125
0.574794
0.442773
0.446727
0.671878
0.53872
0.387297
0.586805
0.619852
0.46985
0.51232
0.32368
0.39937
0.726846
0.498489
0.651481
0.350362
0.801907
0.67456
0.500533
0.572462
0.566208
0.544685
0.503285
0.663234
0.430665
0.479125
0.410225
0.674036
0.568595
0.439709
0.434637
0.396756
0.412854
0.546927
0.693269
0.556988
0.604622
0.539954
0.498926
0.624937
0.510524
0.441567
0.830779
0.484454
0.394885
0.487361
0.511366
0.590958
0.685526
0.36068
0.65101
0.382983
0.570614
0.480519
0.676693
0.683777
0.710335
0.643435
0.797146
0.475691
0.535248
0.562698
0.531228
0.668445
0.391171
0.739601
0.496452
0.459069
0.376218
0.564174
0.463436
0.395483
0.851423
0.469809
0.48433
0.440762
0.464833
0.682869
0.752126
0.685454
0.64959
0.439141
0.626786
0.536053
0.48291
0.620766
0.503881
0.481515
0.537334
0.627684
0.626255
0.505217
0.530835
0.416385
0.41418
0.484371
0.591739
0.581792
0.465379
0.702955
0.647513
0.736928
0.559839
0.470749
0.504336
0.463901
0.420213
0.443222
0.600484
0.529302
0.522572
0.720891
0.682703
0.600847
0.473116
0.639183
0.771179
0.621428
0.603191
0.519032
0.458919
0.737137
0.497455
0.372165
0.731759
0.756629
0.453325
0.510371
0.654657
0.728793
0.747935
0.528855
0.609757
0.492069
0.742022
0.753035
0.436491
0.401605
0.750401
0.504765
0.547235
0.400957
0.791329
0.891235
0.532192
0.578851
0.278323
0.507367
0.439214
0.455048
0.658127
0.670665
0.475923
0.614303
0.751371
0.53688
0.475404
0.464276
0.653245
0.501331
0.410602
0.704962
0.333294
0.52803
0.680123
0.80503
0.813468
0.673072
0.640444
0.679478
0.602475
0.661024
0.313712
0.295545
0.481136
0.539778
0.349537
0.600384
0.406069
0.560759
0.461141
0.354959
0.43188
0.644915
0.451496
0.465172
0.471861
0.517375
0.44354
0.664873
0.7084
0.466462
0.53641
0.680648
0.465015
0.531526
0.545664
0.792104
0.622115
0.612704
0.426624
0.227863
0.496482
0.619495
0.72755
0.788039
0.584363
0.436203
0.240065
0.68023
0.801978
0.589925
0.555985
0.81237
0.620744
0.553953
0.382334
0.678292
0.412616
0.556515
0.539801
0.489471
0.714332
0.513777
0.56931
0.469736
0.45928
0.470365
0.578006
0.541344
0.605589
0.798964
0.439041
0.375154
0.474858
0.433959
0.68334
0.48441
0.698476
0.592896
0.712186
0.500018
0.65018
0.491785
0.704241
0.771684
0.576698
0.588666
0.62761
0.596331
0.488165
0.6979
0.506225
0.446367
0.699483
0.513733
0.367244
0.625679
0.440277
0.159688
0.610896
0.511778
0.394117
0.611824
0.420137
0.413523
0.510234
0.356101
0.38682
0.533828
0.542653
0.638197
0.48319
0.598854
0.648229
0.465169
0.627838
0.547544
0.564706
0.380241
0.396164
0.6691
0.473744
0.828098
0.474485
0.484407
0.594229
0.435228
0.586947
0.74477
0.405066
0.572882
0.595581
0.435306
0.661288
0.614848
0.57583
0.392097
0.537631
0.653509
0.701287
0.504545
0.674842
0.698043
0.573781
0.61601
0.557047
0.451983
0.326667
0.445594
0.711435
0.655889
0.710278
0.584516
0.441861
0.493367
0.819595
0.483498
0.579975
0.607397
0.594776
0.231822
0.541834
0.643402
0.528807
0.566054
0.533869
0.656017
0.614412
0.40059
0.312909
0.719941
0.465541
0.479519
0.566966
0.424676
0.646513
0.500679
0.576853
0.516734
0.359816
0.747872
0.703389
0.483116
0.598212
0.540505
0.457755
0.462178
0.460368
0.495163
0.663943
0.530827
0.584216
0.497058
0.343035
0.53801
0.383166
0.35597
0.714522
0.298953
0.575295
0.571821
0.676183
0.661649
0.584054
0.80721
0.542964
0.424601
0.457984
0.673494
0.441522
0.610616
0.327691
0.704108
0.495354
0.653776
0.498597
0.67534
0.48906
0.555643
0.374708
0.570133
0.540186
0.454079
0.360334
0.52136
0.589581
0.481088
0.855046
0.548594
0.689844
0.642778
0.335397
0.41833
0.406842
0.733346
0.471793
0.484621
0.468223
0.585832
0.442857
0.764826
0.570922
0.545001
0.599167
0.569847
0.601785
0.51008
0.484356
0.694082
0.391369
0.611746
0.623832
0.478684
0.768945
0.518675
0.659611
0.401229
0.642321
0.428023
0.737902
0.735883
0.598944
0.663351
0.440849
0.656871
0.672937
0.665178
0.64112
0.618955
0.450693
0.508443
0.465283
0.64096
0.431007
0.646861
0.465374
0.57326
0.384845
0.640609
0.693391
0.574013
0.616859
0.521202
0.513975
0.547248
0.510559
0.674132
0.507777
0.506005
0.562126
0.561408
0.435743
0.427752
0.474173
0.511813
0.435191
0.60649
0.483009
0.540592
0.488902
0.394853
0.482502
0.432511
0.500127
0.682396
0.688349
0.459878
0.489338
0.556511
0.547495
0.645261
0.532003
0.609755
0.489882
0.705461
0.4548
0.435629
0.61327
0.673342
0.466506
0.420811
0.435265
0.61866
0.465014
0.57032
0.502772
0.53725
0.618273
0.454541
0.473343
0.38553
0.377912
0.496298
0.429262
0.699108
0.339546
0.559325
0.416023
0.589904
0.755177
0.439883
0.474601
0.757771
0.679488
0.557912
0.460595
0.399251
0.685854
0.452515
0.485607
0.731643
0.567113
0.717887
0.544244
0.388118
0.445556
0.399348
0.606265
0.552306
0.38409
0.630461
0.700285
0.560004
0.462346
0.620621
0.821833
0.548467
0.319034
0.605101
0.431446
0.387608
0.653315
0.338303
0.465697
0.654111
0.515661
0.486348
0.518905
0.462771
0.685307
0.479729
0.359913
0.62898
0.503837
0.380718
0.77255
0.46344
0.478678
0.405182
0.479448
0.695028
0.546737
0.502083
0.49673
0.543239
0.344281
0.500247
0.673108
0.303943
0.393169
0.652742
0.690117
0.792762
0.662657
0.59759
0.671916
0.423278
0.493059
0.541598
0.561941
0.520329
0.559165
0.548781
0.532214
0.392809
0.520168
0.504427
0.702295
0.431162
0.395645
0.460018
0.439932
0.537757
0.485594
0.514162
0.6254
0.568862
0.565265
0.435846
0.402823
0.374407
0.844447
0.487167
0.495265
0.647465
0.370238
0.562696
0.440365
0.542114
0.622316
0.506445
0.485669
0.412809
0.691838
0.617626
0.571819
0.328414
0.396036
0.411441
0.752494
0.651551
0.582041
0.500393
0.52961
0.458576
0.600766
0.544097
0.521893
0.51729
0.811121
0.63647
0.630244
0.49121
0.639719
0.401131
0.476163
0.554599
0.462239
0.520527
0.531599
0.736957
0.600829
0.655288
0.525073
0.304192
0.534932
0.500205
0.418151
0.680417
0.509873
0.721373
0.492385
0.387222
0.364154
0.584139
0.613722
0.647577
0.629815
0.308614
0.539251
0.501887
0.471115
0.604809
0.32297
0.453147
0.666413
0.686153
0.309387
0.410296
0.547296
0.607419
0.332554
0.57016
0.535946
0.736485
0.431089
0.643468
0.50709
0.409308
0.633532
0.483558
0.408943
0.588469
0.681175
0.558115
0.652756
0.44014
0.745835
0.662956
0.498384
0.675438
0.716635
0.546226
0.664735
0.497784
0.55056
0.546107
0.500422
0.528902
0.550194
0.517359
0.755958
0.772907
0.544858
0.66649
0.422147
0.484729
0.577832
