# Supplementary material for: Integrated transcriptomic and neuroimaging brain model decodes biological mechanisms in aging and Alzheimer’s disease
Source: eLife. 2021 May 18;10:e62589. doi: 10.7554/eLife.62589 (PMC8131100; doi:10.7554/eLife.62589)
Supplement: Figure 2—source data 1. [file elife-62589-fig2-data1.xlsx]

## Sheet: Figure 2-source data 1
HC	EMCI	LMCI	AD
0.425929	0.374768	0.505907	0.945304
0.501114	0.588361	0.51744	0.984869
0.232191	0.36802	0.514362	0.978635
0.318183	0.24359	0.563385	0.997669
0.155849	0.276757	0.73562	0.987392
0.192544	0.481328	0.529253	0.99926
0.0241481	0.99405	0.264796	0.433107
0.0206109	0.999959	0.53267	0.702521
0.0142294	0.999746	0.303836	0.522705
0.00894066	0.863623	0.213076	0.272706
0.0237392	0.939333	0.162667	0.279238
0.0206724	0.970492	0.50723	0.674494
0.329377	0.275564	0.0167245	0.664764
0.674375	0.672211	0.0668893	0.739283
0.606862	0.793142	0.10448	0.724919
0.154476	0.551096	0.0629516	0.433027
0.0565803	0.355617	0.0846952	0.438335
0.531302	0.677917	0.0435081	0.672665
0.112995	0.4746	0.953578	0.810914
0.332992	0.54008	0.968339	0.862217
0.0486302	0.614456	0.910827	0.852229
0.129815	0.338011	0.998798	0.934074
0.0663689	0.348189	0.987179	0.96984
0.187067	0.562829	0.997013	0.997911
0.156464	0.544152	0.966193	0.94582
0.0667279	0.894999	0.990089	0.751345
0.0813258	0.6029	0.999288	0.815807
0.0859073	0.702049	0.862802	0.660158
0.121402	0.374136	0.930959	0.549566
0.130284	0.409133	0.994107	0.779332
0.2719	0.798316	0.549265	0.976235
0.305836	0.482662	0.759717	0.583242
0.227766	0.333205	0.348453	0.773369
0.291311	0.766141	0.418605	0.685898
0.313956	0.09483	0.867077	0.684124
0.443634	0.745889	0.285365	0.955059
0.434411	0.386997	0.500592	0.616264
0.676151	0.520082	0.736538	0.831218
0.622327	0.623051	0.433854	0.416589
0.476198	0.364018	0.371233	0.503507
0.684675	0.471585	0.549762	0.314741
0.483498	0.27601	0.662697	0.781662
0.315433	0.513729	0.481852	0.998184
0.566062	0.651798	0.556819	0.992042
0.599247	0.740891	0.745896	0.999735
0.462968	0.489425	0.483073	0.997282
0.466566	0.761237	0.722019	0.797484
0.564149	0.592146	0.679449	0.996837
0.229786	0.550567	0.750768	0.99223
0.713345	0.749463	0.756833	0.969896
0.314071	0.763419	0.747298	0.968849
0.568001	0.498513	0.447867	0.999798
0.471706	0.289325	0.677882	0.982299
0.512693	0.614777	0.838337	0.976713
0.488621	0.326418	0.210364	0.52415
0.409149	0.407177	0.196997	0.909272
0.50375	0.423686	0.257299	0.681335
0.514034	0.52405	0.221728	0.529676
0.30344	0.535996	0.293271	0.646687
0.623891	0.409873	0.239449	0.637602
0.30825	0.428793	0.379938	0.730894
0.254749	0.504684	0.421701	0.838051
0.437692	0.348237	0.363952	0.366654
0.288791	0.473952	0.424454	0.2942
0.416752	0.574386	0.529142	0.868498
0.209643	0.333772	0.468861	0.594603
0.226995	0.670213	0.530911	0.998082
0.22187	0.786654	0.617773	0.922217
0.17834	0.518807	0.786189	0.986352
0.0966584	0.280034	0.358972	0.983252
0.150349	0.316658	0.317693	0.997669
0.159828	0.663312	0.759456	0.98314
0.584853	0.729625	0.77123	0.954647
0.797155	0.732944	0.70273	0.988868
0.713373	0.630732	0.889284	0.999778
0.735934	0.678478	0.322754	0.92906
0.266614	0.607582	0.45762	0.659721
0.521005	0.761686	0.791594	0.933507
0.358471	0.993889	0.280173	0.984202
0.738163	0.99874	0.451896	0.940023
0.685621	0.842356	0.301413	0.979075
0.460423	0.998498	0.321269	0.936325
0.243813	0.96514	0.234801	0.962736
0.701584	0.98421	0.291714	0.999114
0.989535	0.406583	0.434264	0.83114
0.924615	0.784961	0.382999	0.532172
0.998258	0.915627	0.508609	0.796501
0.915372	0.276784	0.432121	0.432013
0.80153	0.153901	0.118549	0.324555
0.999085	0.865428	0.296642	0.847559
0.297521	0.621416	0.228256	0.980185
0.6382	0.282839	0.259827	0.994391
0.620764	0.562092	0.31767	0.999923
0.38194	0.338947	0.0953497	0.983098
0.474502	0.421658	0.173481	0.977252
0.579138	0.601702	0.407564	0.967496
0.369454	0.672652	0.62321	0.99852
0.588105	0.604348	0.64636	0.998267
0.425179	0.746715	0.832069	0.999996
0.412958	0.37371	0.841192	0.997934
0.429322	0.328811	0.770583	0.971201
0.318754	0.404276	0.493722	0.987725
0.552814	0.483862	0.806668	0.837638
0.519692	0.429251	0.783075	0.999958
0.583192	0.660585	0.978225	0.952103
0.294914	0.399756	0.828394	0.993475
0.677723	0.325994	0.266654	0.873766
0.556275	0.505747	0.732582	0.98812
0.541951	0.527111	0.573503	0.985326
0.198039	0.555889	0.59109	0.995189
0.551014	0.784118	0.574955	0.98911
0.59029	0.681467	0.37813	0.627517
0.880741	0.488859	0.672625	0.983207
0.340019	0.52324	0.702272	0.991055
0.45264	0.524541	0.991398	0.606771
0.634185	0.633161	0.928791	0.698713
0.78565	0.407625	0.99778	0.455627
0.435498	0.542388	0.919819	0.547498
0.326665	0.214904	0.810057	0.30182
0.347428	0.435536	0.952319	0.510503
0.443287	0.412585	0.307401	0.879123
0.75233	0.570242	0.29911	0.96898
0.358799	0.22797	0.692309	0.973976
0.641778	0.40317	0.457689	0.847458
0.716515	0.410464	0.235386	0.668032
0.118463	0.688107	0.791129	0.855308
0.469341	0.85859	0.631154	0.509892
0.417527	0.925498	0.424155	0.850554
0.677663	0.846923	0.385148	0.861351
0.491697	0.546258	0.310473	0.777999
0.405882	0.850148	0.0845441	0.485115
0.429117	0.756045	0.474083	0.885969
0.990478	0.610244	0.519713	0.670963
0.979226	0.735451	0.52308	0.742889
0.954984	0.73674	0.535569	0.783766
0.983963	0.858447	0.522041	0.4893
0.77493	0.509902	0.447091	0.691966
0.886152	0.724151	0.652862	0.935468
0.719174	0.985428	0.476605	0.886565
0.403417	0.997121	0.930852	0.996468
0.386154	0.983962	0.873419	0.908981
0.726897	0.947362	0.624646	0.980003
0.383001	0.987969	0.519833	0.791114
0.751311	0.999508	0.899014	0.983291
0.841721	0.612062	0.759722	0.684104
0.896714	0.381043	0.920653	0.748247
0.756048	0.534726	0.796816	0.701808
0.690747	0.621562	0.733672	0.8012
0.370157	0.467361	0.614042	0.675035
0.521579	0.336749	0.838287	0.85752
0.300863	0.73684	0.998416	0.843641
0.495497	0.703367	0.948358	0.895061
0.428334	0.684761	0.999144	0.801619
0.270418	0.423162	0.732947	0.894633
0.140274	0.28951	0.765896	0.956874
0.486196	0.787098	0.852934	0.933322
0.395322	0.863097	0.919329	0.508755
0.480149	0.899741	0.94149	0.731749
0.561933	0.998715	0.9637	0.907219
0.48795	0.999882	0.731871	0.538442
0.312354	0.99174	0.649601	0.422579
0.379436	0.98584	0.929528	0.634106
0.580817	0.788588	0.659004	0.977784
0.499664	0.994346	0.954755	0.999849
0.640853	0.693428	0.89914	0.997376
0.0952166	0.668507	0.569354	0.996927
0.147635	0.762553	0.452579	0.956089
0.328507	0.619346	0.883739	0.996667
0.488186	0.527429	0.986212	0.796609
0.434903	0.715163	0.997058	0.998853
0.44294	0.681887	0.99803	0.998771
0.323627	0.457263	0.992024	0.931345
0.0691041	0.702422	0.950794	0.91422
0.566037	0.713572	0.988718	0.976431
0.572734	0.772267	0.510276	0.998717
0.573175	0.780357	0.50261	0.998102
0.658672	0.995717	0.378985	0.923398
0.67774	0.631621	0.201106	0.99476
0.319504	0.516196	0.464448	0.977754
0.450741	0.702789	0.302794	0.952341
0.650118	0.481039	0.288171	0.409154
0.33899	0.389416	0.837282	0.889772
0.49612	0.789619	0.650158	0.961768
0.176541	0.621728	0.491624	0.389461
0.306469	0.382514	0.433298	0.409078
0.742201	0.564031	0.808913	0.704056
0.557455	0.541465	0.508283	0.857127
0.487593	0.804512	0.612988	0.991206
0.325971	0.517479	0.333129	0.941774
0.353011	0.714915	0.280242	0.757128
0.41678	0.608428	0.398864	0.792204
0.357123	0.783996	0.430303	0.797945
0.490866	0.465586	0.477154	0.619896
0.6207	0.55891	0.405393	0.95034
0.804942	0.630164	0.602855	0.770491
0.339851	0.754587	0.437888	0.426115
0.28513	0.285703	0.274083	0.435507
0.255048	0.646384	0.340283	0.673664
0.555295	0.724827	0.260501	0.840373
0.564661	0.686633	0.479218	0.8157
0.439561	0.935034	0.283801	0.638257
0.649663	0.532783	0.157588	0.482758
0.303268	0.63195	0.139532	0.565163
0.55412	0.779628	0.344921	0.830213
0.992757	0.497045	0.802038	0.955934
0.960621	0.554648	0.985672	0.539799
0.975319	0.560635	0.999253	0.542366
0.999166	0.323693	0.764751	0.47139
0.844432	0.225643	0.958693	0.330388
0.937943	0.430432	0.980182	0.641749
0.543227	0.281788	0.700139
0.744513	0.749988	0.613188
0.692894	0.489726	0.690605
0.637264	0.440304	0.747443
0.122807	0.321463	0.602398
0.78609	0.245269	0.453624
0.230608	0.512303	0.584729
0.233725	0.656992	0.78058
0.121586	0.467988	0.8582
0.126643	0.518151	0.515193
0.219489	0.35788	0.619583
0.474584	0.711121	0.660504
0.52799	0.699315	0.604475
0.792472	0.807488	0.76758
0.341399	0.744796	0.499108
0.475872	0.837722	0.741452
0.522033	0.598181	0.227968
0.566939	0.984779	0.37823
0.617415	0.218271	0.640959
0.81169	0.496716	0.63811
0.775077	0.359985	0.656713
0.665436	0.118254	0.545628
0.474482	0.450833	0.699063
0.769116	0.347658	0.393033
0.999892	0.777246	0.567609
0.995977	0.764242	0.712598
0.979904	0.838122	0.863674
0.975654	0.786638	0.542262
0.895935	0.825477	0.740897
0.958755	0.557601	0.636994
0.997616	0.391991	0.494096
0.997555	0.635512	0.501699
0.985479	0.353096	0.640015
0.993993	0.420965	0.479508
0.999938	0.551308	0.778954
0.988636	0.294249	0.496097
0.531778	0.804312	0.714937
0.228846	0.942142	0.389678
0.507825	0.764134	0.61908
0.204747	0.552735	0.46485
0.334369	0.700888	0.60229
0.767086	0.717893	0.527877
0.439305	0.307819	0.375699
0.915099	0.552576	0.319859
0.66231	0.538391	0.692387
0.610951	0.418229	0.33622
0.773625	0.372868	0.222649
0.714457	0.503194	0.698024
0.999475	0.441964	0.705359
0.921406	0.539464	0.856418
0.999653	0.684428	0.918753
0.884054	0.404295	0.849318
0.897408	0.147944	0.336538
0.986107	0.578586	0.587577
0.628099	0.990593	0.695093
0.459593	0.972841	0.808858
0.762249	0.999539	0.834979
0.419536	0.990378	0.474176
0.820567	0.75046	0.355822
0.754319	0.935078	0.571084
0.571137	0.43355	0.479919
0.732859	0.424165	0.891675
0.388356	0.722961	0.752044
0.350689	0.423371	0.567873
0.567603	0.592711	0.437993
0.451305	0.791769	0.534276
0.683809	0.680368	0.678962
0.827886	0.736083	0.945796
0.614954	0.972087	0.90139
0.235565	0.117822	0.760468
0.407408	0.314046	0.522734
0.53752	0.385352	0.765917
0.738521	0.451324	0.802796
0.91719	0.800396	0.8938
0.781497	0.149776	0.841129
0.302722	0.217094	0.549462
0.260329	0.364457	0.354949
0.598656	0.478892	0.772752
0.519318	0.43236	0.420731
0.932027	0.354094	0.451882
0.649885	0.342413	0.471774
0.424643	0.16394	0.415814
0.315494	0.432595	0.387695
0.517592	0.286674	0.63597
0.360664	0.355399	0.451486
0.359315	0.447064	0.401079
0.424818	0.465439	0.471219
0.355892	0.318428	0.494702
0.30078	0.161443	0.457252
0.376947	0.416378	0.499077
0.467848	0.775655	0.469215
0.707753	0.60008	0.607533
0.451934	0.624899	0.716706
0.710425	0.579851	0.310104
0.305616	0.316244	0.393299
0.571727	0.417848	0.695968
0.505695	0.258867	0.696339
0.607122	0.451574	0.699299
0.3887	0.554209	0.648699
0.289336	0.15256	0.504139
0.273456	0.315777	0.696238
0.39362	0.323675	0.738167
0.196813	0.501405	0.643895
0.325456	0.545465	0.804015
0.432622	0.701837	0.976717
0.313297	0.431653	0.747907
0.258001	0.672894	0.579754
0.250824	0.424154	0.427239
0.399883	0.418963	0.679329
0.437604	0.522159	0.859763
0.507203	0.470073	0.620506
0.44702	0.485411	0.56679
0.556376	0.290415	0.651157
0.469028	0.6505	0.425487
0.442581	0.353426	0.302433
0.755275	0.498838	0.234825
0.562414	0.487915	0.234953
0.349853	0.498824	0.242646
0.467411	0.854413	0.06899
0.45424	0.660895	0.113823
0.679542	0.596029	0.372033
0.723683	0.51823	0.246596
0.3447	0.455976	0.2086
0.687422	0.695455	0.24849
0.843561	0.455357	0.152866
0.402949	0.601251	0.229666
0.127596	0.696	0.561696
0.0573412	0.635752	0.371473
0.0247628	0.714902	0.626582
0.0628419	0.664267	0.528079
0.0286625	0.377221	0.205956
0.111727	0.675985	0.277173
0.0900573	0.263942	0.443727
0.0911187	0.833777	0.668964
0.0987183	0.550036	0.628026
0.105182	0.403468	0.336063
0.100984	0.290718	0.397663
0.0888373	0.765946	0.437961
0.646491	0.525922	0.702779
0.690489	0.833686	0.465335
0.534258	0.701364	0.855377
0.0953238	0.755734	0.378745
0.205633	0.802434	0.44779
0.236544	0.906759	0.546161
0.648358	0.649969	0.568474
0.521671	0.704609	0.406787
0.531278	0.409179	0.482405
0.274802	0.222104	0.242289
0.238276	0.264454	0.233043
0.240605	0.459903	0.437325
0.323245	0.604147	0.0959207
0.492325	0.894831	0.148825
0.29303	0.58916	0.225036
0.509298	0.706318	0.0403995
0.301105	0.412831	0.130872
0.282122	0.672567	0.233272
0.649875	0.465416	0.840026
0.857369	0.84166	0.727953
0.667092	0.83725	0.567621
0.592128	0.530118	0.604642
0.525948	0.348718	0.790297
0.389281	0.572306	0.516545
0.336537	0.582639	0.436914
0.552023	0.567172	0.658489
0.309692	0.632633	0.596777
0.631416	0.406943	0.448407
0.286471	0.107322	0.475247
0.313398	0.487986	0.664231
0.173851	0.658235	0.501236
0.31435	0.598322	0.869421
0.460439	0.353354	0.703948
0.208155	0.40045	0.613227
0.160452	0.241118	0.691117
0.162153	0.782852	0.648329
0.410421	0.220233	0.650651
0.493496	0.391687	0.785427
0.589554	0.573892	0.477062
0.305805	0.211039	0.561463
0.156249	0.241727	0.481284
0.466145	0.243255	0.794398
0.22969	0.74105	0.415374
0.487484	0.597283	0.470133
0.438856	0.622649	0.563495
0.357795	0.284702	0.312039
0.190865	0.293356	0.115773
0.56432	0.485992	0.347464
0.787272	0.531074	0.671693
0.977323	0.793602	0.384491
0.756339	0.858121	0.328891
0.842038	0.531973	0.713065
0.283673	0.31471	0.0614134
0.699524	0.835773	0.763843
0.681646	0.339561	0.918364
0.208968	0.547195	0.922577
0.535163	0.859762	0.977778
0.542161	0.416833	0.959395
0.309566	0.376862	0.986604
0.500731	0.466539	0.953921
0.329385	0.351628	0.656265
0.802006	0.342359	0.632302
0.898157	0.351665	0.551224
0.959834	0.324739	0.586991
0.479462	0.5652	0.684339
0.452138	0.52812	0.48513
0.118728	0.461901	0.443618
0.190384	0.44716	0.608031
0.222811	0.479197	0.462637
0.185193	0.374674	0.557631
0.276457	0.726814	0.401501
0.101427	0.289624	0.479544
0.414897	0.479063	0.729186
0.347357	0.554512	0.738588
0.153698	0.495392	0.863779
0.114288	0.16971	0.814243
0.0598339	0.533597	0.936534
0.263702	0.3246	0.853721
0.655587	0.623769	0.798228
0.409538	0.704044	0.570123
0.625338	0.844454	0.67833
0.447212	0.624526	0.420882
0.585441	0.527265	0.581315
0.845123	0.862095	0.935439
0.258491	0.44881	0.736634
0.15477	0.90276	0.803838
0.455397	0.732284	0.993144
0.33102	0.687592	0.99211
0.451698	0.78401	0.997819
0.268001	0.583561	0.999418
0.389669	0.999643	0.649604
0.336484	0.989357	0.297483
0.36785	0.999786	0.584505
0.351258	0.928417	0.415225
0.3988	0.953434	0.329024
0.306294	0.972639	0.364888
0.807298	0.238566	0.784413
0.793147	0.75291	0.943803
0.673038	0.850271	0.54919
0.737807	0.482618	0.659096
0.746204	0.448847	0.84342
0.603577	0.591154	0.94819
0.560071	0.620686	0.156086
0.585483	0.523265	0.543267
0.349127	0.828145	0.354125
0.255313	0.734219	0.291132
0.400504	0.250291	0.228407
0.313853	0.709131	0.232559
0.616477	0.605845	0.53494
0.870427	0.364875	0.521125
0.547431	0.653697	0.716449
0.312695	0.585855	0.510907
0.286043	0.474928	0.590857
0.571334	0.768185	0.513963
0.4129	0.440899	0.441186
0.530166	0.383183	0.212494
0.32659	0.758751	0.316103
0.182594	0.682521	0.231948
0.314862	0.422511	0.197792
0.457983	0.583579	0.0964934
0.686085	0.588613	0.592932
0.650513	0.649074	0.852406
0.960796	0.736087	0.776591
0.377414	0.50437	0.701838
0.320083	0.659966	0.674535
0.677839	0.522643	0.665009
0.997533	0.851502	0.368795
0.999016	0.741536	0.568883
0.998209	0.678628	0.498437
0.998904	0.573568	0.548286
0.954589	0.866877	0.728059
0.999925	0.777595	0.706428
0.414941	0.644971	0.616296
0.37055	0.588102	0.510562
0.355441	0.63267	0.847515
0.224245	0.575998	0.605303
0.194659	0.94211	0.331989
0.426961	0.683719	0.692873
0.575549	0.50853	0.588215
0.636478	0.680068	0.556711
0.776311	0.330656	0.786888
0.442878	0.315912	0.464889
0.327302	0.493065	0.444556
0.51151	0.412973	0.363134
0.0661382	0.425675	0.648132
0.0627409	0.680744	0.945327
0.0515763	0.177949	0.803208
0.0423538	0.263347	0.874509
0.0668812	0.132019	0.747308
0.0253363	0.340367	0.810632
0.443933	0.87602	0.617746
0.345479	0.931135	0.627074
0.314135	0.959079	0.696584
0.359345	0.748581	0.616486
0.499414	0.537444	0.626066
0.183069	0.93941	0.474223
0.622333	0.643424	0.792798
0.471283	0.484985	0.880786
0.420635	0.307982	0.886143
0.652283	0.270241	0.654603
0.381856	0.213639	0.564977
0.411587	0.325777	0.619925
0.546497	0.419017	0.294786
0.827567	0.880648	0.351456
0.483582	0.703562	0.647582
0.389143	0.415512	0.463233
0.524327	0.334565	0.781093
0.614698	0.629222	0.409427
0.203341	0.731265	0.735106
0.455403	0.637732	0.787659
0.3526	0.645267	0.7216
0.341192	0.439744	0.691018
0.346278	0.508549	0.76408
0.358389	0.85521	0.515412
0.587317	0.81576	0.785166
0.502543	0.77459	0.74793
0.635283	0.526063	0.932253
0.462476	0.521095	0.58802
0.551333	0.276217	0.712739
0.539689	0.660342	0.765715
0.498947	0.750919	0.293992
0.76207	0.943832	0.599459
0.564577	0.655122	0.323874
0.373204	0.698706	0.300568
0.448567	0.192847	0.160035
0.700797	0.679365	0.375111
0.4312	0.883018	0.537148
0.515985	0.928945	0.753371
0.478124	0.958077	0.614445
0.643386	0.696231	0.505423
0.287166	0.767254	0.745519
0.666585	0.92681	0.638469
0.393926	0.490833	0.815975
0.553053	0.270406	0.451099
0.596341	0.372199	0.428695
0.502914	0.329799	0.483546
0.610235	0.396071	0.331502
0.461856	0.4731	0.732076
0.380352	0.778993	0.752412
0.511932	0.783833	0.741777
0.579717	0.688482	0.863602
0.30919	0.494456	0.712192
0.427016	0.158273	0.8109
0.363713	0.785887	0.525538
0.773886	0.354246	0.658735
0.810619	0.709668	0.442795
0.739306	0.523811	0.803744
0.341793	0.247744	0.408425
0.355626	0.173777	0.519371
0.759824	0.174017	0.742753
0.863672	0.685279	0.592538
0.896448	0.419202	0.58572
0.879276	0.549822	0.787173
0.914422	0.350503	0.512468
0.625906	0.530872	0.720705
0.96643	0.353185	0.394133
0.69547	0.691647	0.367716
0.821539	0.604606	0.462024
0.457769	0.442204	0.593831
0.542627	0.429197	0.459195
0.660822	0.215371	0.450554
0.438443	0.65408	0.526496
0.469463	0.668017	0.93095
0.584003	0.632928	0.962751
0.364969	0.615799	0.996959
0.144943	0.197931	0.953051
0.155212	0.11553	0.993366
0.35082	0.584142	0.996346
0.415245	0.653437	0.645454
0.368266	0.731804	0.6321
0.418976	0.778471	0.676535
0.262238	0.765713	0.477802
0.303913	0.547588	0.610013
0.197887	0.64955	0.405359
0.999129	0.384235	0.639708
0.990438	0.586482	0.576549
0.996195	0.822711	0.540252
0.946243	0.532078	0.590097
0.974986	0.18744	0.588096
0.990379	0.851905	0.500869
0.974635	0.833366	0.507096
0.891023	0.812234	0.632774
0.975899	0.891916	0.602057
0.984549	0.613661	0.421383
0.994949	0.619545	0.485392
0.982419	0.744508	0.403305
0.477531	0.494591	0.314992
0.722722	0.439566	0.166789
0.667733	0.460043	0.482511
0.492203	0.456995	0.466966
0.503469	0.393273	0.456876
0.448432	0.721949	0.470564
0.618039	0.792341	0.734307
0.954858	0.928885	0.587159
0.591397	0.796261	0.591886
0.962424	0.515849	0.215338
0.971025	0.807419	0.534595
0.798026	0.489426	0.339816
0.889557	0.498155	0.590677
0.866353	0.30969	0.662397
0.721199	0.688435	0.303753
0.450949	0.771617	0.373808
0.312722	0.136227	0.512546
0.876928	0.747487	0.502825
0.467058	0.680376	0.12178
0.647322	0.782697	0.759555
0.611109	0.784679	0.443911
0.442967	0.844669	0.438774
0.535181	0.298209	0.572947
0.331342	0.887451	0.616731
0.463281	0.590059	0.52848
0.743242	0.467752	0.669664
0.450646	0.510014	0.659415
0.352193	0.349521	0.609338
0.350654	0.32058	0.690186
0.267412	0.598232	0.72994
0.646055	0.550905	0.528323
0.860463	0.590959	0.55969
0.673904	0.555894	0.568269
0.429421	0.652065	0.672134
0.615958	0.271888	0.632486
0.642151	0.606062	0.662412
0.493629	0.391087	0.495685
0.434977	0.25798	0.627115
0.676597	0.377563	0.629265
0.630493	0.307024	0.580711
0.717667	0.326358	0.660377
0.553766	0.311933	0.509281
0.252343	0.507401	0.930417
0.759149	0.43928	0.982683
0.482956	0.671417	0.891304
0.478505	0.523506	0.943208
0.316713	0.438627	0.953516
0.484029	0.542582	0.813831
0.771289	0.589164	0.996483
0.996834	0.682143	0.91896
0.798354	0.526892	0.999189
0.688585	0.373524	0.796904
0.621243	0.700953	0.837725
0.774342	0.596946	0.997316
0.631647	0.602102	0.853864
0.404504	0.743575	0.602701
0.589837	0.351963	0.697375
0.517796	0.629634	0.509561
0.660189	0.361542	0.54537
0.32583	0.798909	0.586816
0.43514	0.250782	0.999969
0.323163	0.437391	0.982251
0.434285	0.794913	0.998336
0.302445	0.475115	0.924083
0.419631	0.752776	0.949806
0.38511	0.256637	0.997183
0.121781	0.631335	0.47269
0.148624	0.667457	0.700388
0.167639	0.61965	0.632193
0.0994069	0.268047	0.438987
0.171767	0.336889	0.14275
0.230792	0.55368	0.502707
0.511337	0.843791	0.551269
0.354902	0.666392	0.630034
0.511551	0.913535	0.621158
0.590167	0.433645	0.359184
0.547333	0.502914	0.469764
0.529388	0.828881	0.4149
0.358973	0.247219	0.998499
0.750573	0.0736517	0.986692
0.291431	0.198322	0.99859
0.247285	0.0969818	0.959067
0.3549	0.158209	0.852248
0.53037	0.247088	0.996377
0.89801	0.350003
0.944076	0.380473
0.972798	0.247239
0.91198	0.33283
0.960994	0.38016
0.966925	0.282966
0.741663	0.447237
0.654415	0.358532
0.540158	0.380705
0.612756	0.337906
0.293397	0.553456
0.549227	0.344893
0.912945	0.481297
0.849505	0.693528
0.807975	0.578012
0.565157	0.326533
0.288108	0.610958
0.843372	0.642139
0.748358	0.743079
0.863973	0.47059
0.594442	0.49932
0.731945	0.502883
0.75502	0.24797
0.413599	0.625346
0.482685	0.586909
0.618072	0.736897
0.499231	0.600343
0.5113	0.483779
0.275488	0.58649
0.620751	0.518293
0.535221	0.619315
0.709996	0.952619
0.49388	0.892616
0.268242	0.736211
0.265772	0.263071
0.763159	0.770755
0.300564	0.798788
0.496534	0.564293
0.571987	0.903885
0.48207	0.51266
0.470229	0.289742
0.191643	0.696219
0.269815	0.391922
0.278033	0.348855
0.281593	0.673317
0.343105	0.634284
0.272607	0.895973
0.144652	0.283721
0.567135	0.393957
0.407799	0.688383
0.531703	0.649688
0.488718	0.480224
0.768013	0.766568
0.672105	0.372694
0.728833	0.814923
0.787762	0.288303
0.530325	0.846689
0.835068	0.758102
0.866194	0.873715
0.472974	0.472513
0.438916	0.351084
0.148101	0.468522
0.588094	0.254653
0.473346	0.446026
0.61659	0.345206
0.374833	0.31056
0.46934	0.642364
0.625204	0.620968
0.544125	0.623514
0.405742	0.516845
0.45539	0.3888
0.389075	0.593072
0.281833	0.610258
0.405752	0.614969
0.424374	0.396789
0.151843	0.233096
0.305132	0.150763
0.214522	0.568877
0.566132	0.523863
0.53083	0.810055
0.578995	0.624336
0.613571	0.350546
0.486113	0.325792
0.348024	0.683852
0.677881	0.40938
0.748747	0.618327
0.963409	0.484021
0.622489	0.508319
0.792714	0.229421
0.713639	0.467919
0.469148	0.376603
0.824903	0.840452
0.547134	0.892732
0.529864	0.802211
0.578975	0.566966
0.698978	0.767092
0.385555	0.628879
0.569312	0.647901
0.519175	0.442174
0.444586	0.311775
0.685232	0.255385
0.432189	0.38651
0.0656449	0.338071
0.096247	0.914124
0.0737957	0.759261
0.0516676	0.859234
0.0580537	0.367549
0.0175281	0.774006
0.290738	0.685088
0.579328	0.801741
0.468878	0.716727
0.311241	0.565247
0.22617	0.575801
0.379846	0.588639
0.618097	0.516617
0.515887	0.346565
0.72075	0.158367
0.642194	0.559913
0.580347	0.128413
0.55171	0.386286
0.7682	0.684573
0.40763	0.888673
0.402611	0.668755
0.487019	0.656471
0.80153	0.706417
0.323603	0.536523
0.493335	0.977508
0.614707	0.987814
0.44139	0.999967
0.216321	0.997483
0.389876	0.999377
0.491758	0.994398
0.801647	0.642427
0.572255	0.815811
0.892411	0.787955
0.92699	0.747774
0.972471	0.596499
0.728269	0.731992
0.400802	0.593205
0.756485	0.717526
0.875175	0.728964
0.985875	0.823487
0.416945	0.690201
0.486188	0.820128
0.579563	0.460721
0.338938	0.646976
0.673683	0.57952
0.289161	0.385992
0.229744	0.385894
0.491668	0.622876
0.563159	0.707916
0.732904	0.820855
0.737736	0.878866
0.768103	0.574667
0.828139	0.370168
0.779248	0.599229
0.816332	0.307373
0.806298	0.643632
0.595301	0.30709
0.241651	0.385712
0.276163	0.154868
0.484487	0.341886
0.299172	0.225206
0.498515	0.240123
0.642506	0.539431
0.548545	0.511706
0.561515	0.640818
0.580306	0.648373
0.620054	0.602998
0.629255	0.838101
0.65429	0.673859
0.331962	0.608908
0.453864	0.424953
0.664729	0.695253
0.367244	0.309778
0.2305	0.99465
0.406981	0.769645
0.200452	0.904619
0.396258	0.537483
0.300436	0.644019
0.430197	0.66849
0.570865	0.687609
0.555596	0.658679
0.268054	0.504125
0.363498	0.766449
0.423101	0.710411
0.591927	0.569197
0.687317	0.424961
0.664678	0.267914
0.56215	0.530207
0.58435	0.678715
0.640365	0.349575
0.478824	0.521048
0.522579	0.821326
0.606369	0.647235
0.602198	0.550419
0.412569	0.609542
0.549167	0.711973
0.369169	0.442728
0.333132	0.11643
0.226287	0.523924
0.317889	0.339182
0.19603	0.209099
0.412652	0.533104
0.746957	0.419999
0.833789	0.395211
0.806087	0.23416
0.589934	0.475179
0.685094	0.144881
0.624599	0.296794
0.490341	0.416336
0.3381	0.66692
0.593748	0.531789
0.392666	0.654879
0.557159	0.32165
0.259909	0.383088
0.53657	0.521267
0.615497	0.766937
0.933173	0.920562
0.681567	0.764155
0.723765	0.180369
0.61739	0.75562
0.377965	0.50229
0.450823	0.222454
0.469623	0.233611
0.393591	0.186063
0.604787	0.176004
0.237912	0.244289
	0.637586
	0.390391
	0.634556
	0.385606
	0.141588
	0.393107
	0.9996
	0.984064
	0.860637
	0.911018
	0.99232
	0.893911
	0.915482
	0.929713
	0.982139
	0.953903
	0.924193
	0.997646
	0.540403
	0.358245
	0.431392
	0.268374
	0.191472
	0.469752
	0.734541
	0.734936
	0.627375
	0.680245
	0.376682
	0.820299
	0.946303
	0.999573
	0.999837
	0.998448
	0.998454
	0.999191
	0.61612
	0.598305
	0.925997
	0.529399
	0.48695
	0.726839
	0.553342
	0.38255
	0.681351
	0.330555
	0.320189
	0.726979
	0.510636
	0.702945
	0.596116
	0.650472
	0.817543
	0.560759
	0.466375
	0.542082
	0.665872
	0.348391
	0.241369
	0.683133
