# Supplementary material for: Integrated transcriptomic and neuroimaging brain model decodes biological mechanisms in aging and Alzheimer’s disease
Source: eLife. 2021 May 18;10:e62589. doi: 10.7554/eLife.62589 (PMC8131100; doi:10.7554/eLife.62589)
Supplement: Figure 3—source data 1. [file elife-62589-fig3-data1.xlsx]

## Sheet: Figure 3-source data 1
PC Variance	P-value	Gene	Salience	Standard Error	Amyloid-β		Functional Activity		Tau
50.273	0.0074	TSKU	-1.80344	0.68054	Gene	Factor Modulated	Gene	Factor Modulated	Gene	Factor Modulated
22.3308	0.1329	GNA15	-1.05037	0.397404	TSKU	Amyloid-β	SESN1	Blood flow	CASP10	Blood flow
17.5505	0.4199	LSM6	-1.51543	0.571159	LSM6	Tau	PLSCR3	Amyloid-β	C5	Functional activity
9.00764	0.8979	SESN1	1.53445	0.481725	GNA15	Tau	BIRC5	Tau
0.838135	0.9996	PLSCR3	1.10482	0.394231
		BIRC5	1.33887	0.506264
		CASP10	-1.98538	0.762581
		C5	2.84706	0.960487
