# Supplementary material for: Integrated transcriptomic and neuroimaging brain model decodes biological mechanisms in aging and Alzheimer’s disease
Source: eLife. 2021 May 18;10:e62589. doi: 10.7554/eLife.62589 (PMC8131100; doi:10.7554/eLife.62589)
Supplement: Figure 4—source data 1. [file elife-62589-fig4-data1.xlsx]

## Sheet: Figure 3-source data 1
PC Variance	P-value	Gene	Salience	Standard Error	Cerebral Blood Flow		Amyloid-β		Functional Activity		Glucose Metabolism		Grey Matter Density		Tau
63.8517	0.009	POLE2	2.1232	0.709557	Gene	Factor Modulated	Gene	Factor Modulated	Gene	Factor Modulated	Gene	Factor Modulated	Gene	Factor Modulated	Gene	Factor Modulated
13.8008	0.2899	RPA3	-3.07955	0.682542	POLE2	Blood flow	RBM6	Blood flow	AGL	Blood flow	ETFB	Blood flow	FHL2	Blood flow	CDK4	Blood flow
11.7347	0.4877	CEBPD	2.16215	0.787179	RPA3	Blood flow	CISD1	Blood flow	KIF2C	Blood flow	ADGRG1	Blood flow	CAST	Amyloid-β	NFATC4	Amyloid-β
10.0924	0.6215	DCK	1.48154	0.570106	CEBPD	Amyloid-β	PRR7	Blood flow	MCUR1	Blood flow	IGF2R	Amyloid-β	LYN	Amyloid-β	MPC2	Amyloid-β
0.520358	0.9994	S100A13	1.69593	0.514914	DCK	Amyloid-β	SDHB	Amyloid-β	NNT	Functional activity	MOK	Amyloid-β	DYNLT3	Amyloid-β	FAM69A	Amyloid-β
		TP53BP2	3.30096	0.738199	S100A13	Amyloid-β	STAT3	Amyloid-β	APBB2	Glucose metabolism	CCNA1	Amyloid-β	DFFB	Functional activity	HMOX1	Functional activity
		WFS1	2.89786	0.800301	TP53BP2	Amyloid-β	TFAP2A	Amyloid-β	STAT3	Glucose metabolism	LSM6	Amyloid-β	IGF2R	Glucose metabolism	TIMELESS	Functional activity
		CTNNAL1	2.05761	0.728872	WFS1	Amyloid-β	FOXJ3	Amyloid-β	ARHGEF2	Glucose metabolism	ARID5B	Amyloid-β	RUVBL1	Glucose metabolism	SCARB1	Glucose metabolism
		LYPLA1	-2.66892	0.626494	CTNNAL1	Amyloid-β	TIPARP	Amyloid-β	EIF4EBP1	Grey matter density	LOXL1	Functional activity	DENND2D	Glucose metabolism	CDC25A	Glucose metabolism
		SPEN	2.11362	0.579155	LYPLA1	Amyloid-β	HN1L	Amyloid-β	HPRT1	Grey matter density	SLC35B1	Functional activity	CBR3	Grey matter density	FDFT1	Glucose metabolism
		NOSIP	2.29775	0.787133	SPEN	Amyloid-β	CASP3	Functional activity	RELB	Grey matter density	MOK	Functional activity	EPHA3	Grey matter density	CXCL2	Glucose metabolism
		PAF1	2.10587	0.597835	NOSIP	Amyloid-β	MRPL19	Functional activity	RAB11FIP2	Grey matter density	AARS	Grey matter density	PPIC	Grey matter density	UBE3C	Glucose metabolism
		DHRS7	-1.54495	0.567999	PAF1	Amyloid-β	GFPT1	Glucose metabolism	PAK4	Tau	CBR1	Grey matter density	RFC5	Grey matter density	FAM20B	Glucose metabolism
		GNAS	2.22138	0.613831	DHRS7	Functional activity	DDX42	Glucose metabolism			NUCB2	Grey matter density	PAX8	Grey matter density	CASP7	Grey matter density
		MEF2C	2.25251	0.745045	GNAS	Glucose metabolism	NUDCD3	Glucose metabolism			MRPL12	Grey matter density	FBXO11	Grey matter density	MYLK	Grey matter density
		CCNA1	4.23406	0.896079	MEF2C	Glucose metabolism	ZNF586	Glucose metabolism			TRAM2	Grey matter density	CREB1	Tau	PHKG2	Grey matter density
		GNPDA1	1.4493	0.499433	CCNA1	Glucose metabolism	TRIB3	Glucose metabolism			KIF2C	Grey matter density	MUC1	Tau	RNMT	Grey matter density
		RBKS	2.34958	0.520743	GNPDA1	Glucose metabolism	FAM20B	Grey matter density			RAB21	Grey matter density	TP53BP2	Tau	MELK	Grey matter density
		PLSCR1	1.81476	0.627657	RBKS	Glucose metabolism	NPEPL1	Grey matter density			SOCS2	Tau			TICAM1	Grey matter density
		PSMD4	1.73926	0.636884	PLSCR1	Glucose metabolism	LRP10	Tau			DNAJB6	Tau			BAD	Tau
		CXCR4	2.17754	0.740675	PSMD4	Glucose metabolism									RAP1GAP	Tau
		MALT1	-1.78588	0.675916	CXCR4	Glucose metabolism									PDHX	Tau
		GPATCH8	-2.06626	0.65528	MALT1	Glucose metabolism									P4HA2	Tau
		FKBP4	-1.87231	0.576863	GPATCH8	Glucose metabolism									MTF2	Tau
		GNB5	2.52003	0.661269	FKBP4	Tau									SACM1L	Tau
		TMEM109	-2.14834	0.408082	GNB5	Tau									COASY	Tau
		RBM6	-1.19008	0.403114	TMEM109	Tau									NFATC4	Tau
		CISD1	-1.89915	0.633605											TICAM1	Tau
		PRR7	-1.76855	0.596805
		SDHB	1.88445	0.637592
		STAT3	3.78509	0.924927
		TFAP2A	-2.95837	0.894421
		FOXJ3	1.91358	0.649053
		TIPARP	-1.87967	0.675808
		HN1L	1.99728	0.675079
		CASP3	-1.47526	0.561076
		MRPL19	2.35679	0.619824
		GFPT1	1.64355	0.524264
		DDX42	-1.49194	0.415719
		NUDCD3	-1.72584	0.653681
		ZNF586	-1.97276	0.713111
		TRIB3	-2.87477	0.595043
		FAM20B	4.91169	0.938362
		NPEPL1	-1.45751	0.498709
		LRP10	-1.59033	0.531139
		AGL	-1.49756	0.557326
		KIF2C	4.67979	0.978247
		MCUR1	-1.871	0.697299
		NNT	1.62891	0.511914
		APBB2	-1.95833	0.641596
		ARHGEF2	-2.4895	0.730796
		EIF4EBP1	-1.30166	0.423147
		HPRT1	3.12796	0.786038
		RELB	1.29033	0.394588
		RAB11FIP2	2.2158	0.613319
		PAK4	2.52687	0.627032
		ETFB	-1.75241	0.602517
		ADGRG1	-2.14485	0.62456
		IGF2R	3.53618	0.900784
		MOK	3.12174	0.792708
		LSM6	-1.81773	0.637554
		ARID5B	-1.92272	0.636506
		LOXL1	2.20736	0.715027
		SLC35B1	-1.41462	0.516962
		AARS	-1.7765	0.573749
		CBR1	-1.68503	0.621701
		NUCB2	-1.66308	0.554707
		MRPL12	1.95248	0.687619
		TRAM2	-1.91203	0.696484
		RAB21	1.6362	0.593759
		SOCS2	1.67976	0.610618
		DNAJB6	1.3535	0.437811
		FHL2	-1.44538	0.448383
		CAST	-1.13219	0.356007
		LYN	1.84347	0.52694
		DYNLT3	1.22602	0.425023
		DFFB	1.00639	0.388698
		RUVBL1	-1.36831	0.485437
		DENND2D	0.948323	0.353239
		CBR3	-1.55719	0.421715
		EPHA3	-1.97472	0.446373
		PPIC	-1.08109	0.392805
		RFC5	1.21001	0.45531
		PAX8	-2.53921	0.50488
		FBXO11	-1.43368	0.435334
		CREB1	1.83584	0.567686
		MUC1	2.23957	0.763333
		CDK4	-1.49386	0.570638
		NFATC4	4.22448	0.941738
		MPC2	2.26234	0.696215
		FAM69A	2.36871	0.768142
		HMOX1	2.07773	0.722934
		TIMELESS	-1.64242	0.586267
		SCARB1	-1.04895	0.361726
		CDC25A	2.26976	0.833044
		FDFT1	-2.6504	0.635857
		CXCL2	1.95369	0.528686
		UBE3C	-2.60285	0.5843
		CASP7	-1.8146	0.623995
		MYLK	-1.88455	0.560661
		PHKG2	-2.05276	0.654891
		RNMT	-1.7405	0.417194
		MELK	1.82714	0.617817
		TICAM1	3.73263	0.800999
		BAD	-1.74068	0.596916
		RAP1GAP	-1.56524	0.509511
		PDHX	2.48745	0.805261
		P4HA2	-1.94567	0.68698
		MTF2	1.46635	0.456099
		SACM1L	1.4972	0.579767
		COASY	1.60471	0.618282
