# Supplementary material for: Integrated transcriptomic and neuroimaging brain model decodes biological mechanisms in aging and Alzheimer’s disease
Source: eLife. 2021 May 18;10:e62589. doi: 10.7554/eLife.62589 (PMC8131100; doi:10.7554/eLife.62589)
Supplement: Supplementary file 2. [file elife-62589-supp2.xlsx]

## Sheet: Sheet1
Entrez ID	Gene Symbol	Gene Name
16	AARS	alanyl-tRNA synthetase
10058	ABCB6	ATP binding cassette subfamily B member 6 (Langereis blood group)
10057	ABCC5	ATP binding cassette subfamily C member 5
23	ABCF1	ATP binding cassette subfamily F member 1
55324	ABCF3	ATP binding cassette subfamily F member 3
63874	ABHD4	abhydrolase domain containing 4
57406	ABHD6	abhydrolase domain containing 6
25	ABL1	ABL proto-oncogene 1, non-receptor tyrosine kinase
30	ACAA1	acetyl-CoA acyltransferase 1
39	ACAT2	acetyl-CoA acetyltransferase 2
64746	ACBD3	acyl-CoA binding domain containing 3
65057	ACD	ACD, shelterin complex subunit and telomerase recruitment factor
47	ACLY	ATP citrate lyase
23597	ACOT9	acyl-CoA thioesterase 9
102	ADAM10	ADAM metallopeptidase domain 10
23536	ADAT1	adenosine deaminase, tRNA specific 1
976	ADGRE5	adhesion G protein-coupled receptor E5
9289	ADGRG1	adhesion G protein-coupled receptor G1
128	ADH5	alcohol dehydrogenase 5 (class III), chi polypeptide
55256	ADI1	acireductone dioxygenase 1
84890	ADO	2-aminoethanethiol dioxygenase
154	ADRB2	adrenoceptor beta 2
178	AGL	amylo-alpha-1, 6-glucosidase, 4-alpha-glucanotransferase
10270	AKAP8	A-kinase anchoring protein 8
26993	AKAP8L	A-kinase anchoring protein 8 like
8574	AKR7A2	aldo-keto reductase family 7 member A2
207	AKT1	AKT serine/threonine kinase 1
211	ALAS1	5-aminolevulinate synthase 1
501	ALDH7A1	aldehyde dehydrogenase 7 family member A1
226	ALDOA	aldolase, fructose-bisphosphate A
230	ALDOC	aldolase, fructose-bisphosphate C
51005	AMDHD2	amidohydrolase domain containing 2
55608	ANKRD10	ankyrin repeat domain 10
55129	ANO10	anoctamin 10
310	ANXA7	annexin A7
323	APBB2	amyloid beta precursor protein binding family B member 2
348	APOE	apolipoprotein E
351	APP	amyloid beta precursor protein
10513	APPBP2	amyloid beta precursor protein binding protein 2
23647	ARFIP2	ADP ribosylation factor interacting protein 2
392	ARHGAP1	Rho GTPase activating protein 1
23365	ARHGEF12	Rho guanine nucleotide exchange factor 12
9181	ARHGEF2	Rho/Rac guanine nucleotide exchange factor 2
51742	ARID4B	AT-rich interaction domain 4B
84159	ARID5B	AT-rich interaction domain 5B
10123	ARL4C	ADP ribosylation factor like GTPase 4C
9915	ARNT2	aryl hydrocarbon receptor nuclear translocator 2
10776	ARPP19	cAMP regulated phosphoprotein 19
427	ASAH1	N-acylsphingosine amidohydrolase 1
10973	ASCC3	activating signal cointegrator 1 complex subunit 3
466	ATF1	activating transcription factor 1
22809	ATF5	activating transcription factor 5
22926	ATF6	activating transcription factor 6
64422	ATG3	autophagy related 3
23300	ATMIN	ATM interactor
23200	ATP11B	ATPase phospholipid transporting 11B (putative)
481	ATP1B1	ATPase Na+/K+ transporting subunit beta 1
27032	ATP2C1	ATPase secretory pathway Ca2+ transporting 1
27109	ATP5S	ATP synthase, H+ transporting, mitochondrial Fo complex subunit s (factor B)
533	ATP6V0B	ATPase H+ transporting V0 subunit b
51382	ATP6V1D	ATPase H+ transporting V1 subunit D
6790	AURKA	aurora kinase A
9212	AURKB	aurora kinase B
8312	AXIN1	axin 1
11041	B4GAT1	beta-1,4-glucuronyltransferase 1
25825	BACE2	beta-site APP-cleaving enzyme 2
572	BAD	BCL2 associated agonist of cell death
9531	BAG3	BCL2 associated athanogene 3
25805	BAMBI	BMP and activin membrane bound inhibitor
581	BAX	BCL2 associated X, apoptosis regulator
596	BCL2	BCL2, apoptosis regulator
9275	BCL7B	BCL tumor suppressor 7B
622	BDH1	3-hydroxybutyrate dehydrogenase 1
8678	BECN1	beclin 1
8553	BHLHE40	basic helix-loop-helix family member e40
637	BID	BH3 interacting domain death agonist
329	BIRC2	baculoviral IAP repeat containing 2
332	BIRC5	baculoviral IAP repeat containing 5
10904	BLCAP	bladder cancer associated protein
642	BLMH	bleomycin hydrolase
644	BLVRA	biliverdin reductase A
652	BMP4	bone morphogenetic protein 4
664	BNIP3	BCL2 interacting protein 3
665	BNIP3L	BCL2 interacting protein 3 like
670	BPHL	biphenyl hydrolase like
672	BRCA1	BRCA1, DNA repair associated
695	BTK	Bruton tyrosine kinase
701	BUB1B	BUB1 mitotic checkpoint serine/threonine kinase B
28969	BZW2	basic leucine zipper and W2 domains 2
25966	C2CD2	C2 calcium dependent domain containing 2
9854	C2CD2L	C2CD2 like
9847	C2CD5	C2 calcium dependent domain containing 5
727	C5	complement C5
51719	CAB39	calcium binding protein 39
808	CALM3	calmodulin 3
813	CALU	calumenin
23271	CAMSAP2	calmodulin regulated spectrin associated protein family member 2
124583	CANT1	calcium activated nucleotidase 1
823	CAPN1	calpain 1
55604	CARMIL1	capping protein regulator and myosin 1 linker 1
22794	CASC3	cancer susceptibility 3
8573	CASK	calcium/calmodulin dependent serine protein kinase
843	CASP10	caspase 10
835	CASP2	caspase 2
836	CASP3	caspase 3
840	CASP7	caspase 7
831	CAST	calpastatin
847	CAT	catalase
868	CBLB	Cbl proto-oncogene B
873	CBR1	carbonyl reductase 1
874	CBR3	carbonyl reductase 3
11007	CCDC85B	coiled-coil domain containing 85B
79080	CCDC86	coiled-coil domain containing 86
80212	CCDC92	coiled-coil domain containing 92
6347	CCL2	C-C motif chemokine ligand 2
8900	CCNA1	cyclin A1
890	CCNA2	cyclin A2
891	CCNB1	cyclin B1
9133	CCNB2	cyclin B2
595	CCND1	cyclin D1
896	CCND3	cyclin D3
9134	CCNE2	cyclin E2
899	CCNF	cyclin F
902	CCNH	cyclin H
9738	CCP110	centriolar coiled-coil protein 110
51293	CD320	CD320 molecule
958	CD40	CD40 molecule
960	CD44	CD44 molecule (Indian blood group)
965	CD58	CD58 molecule
991	CDC20	cell division cycle 20
993	CDC25A	cell division cycle 25A
994	CDC25B	cell division cycle 25B
998	CDC42	cell division cycle 42
8318	CDC45	cell division cycle 45
55038	CDCA4	cell division cycle associated 4
1001	CDH3	cadherin 3
983	CDK1	cyclin dependent kinase 1
23097	CDK19	cyclin dependent kinase 19
1017	CDK2	cyclin dependent kinase 2
1019	CDK4	cyclin dependent kinase 4
8851	CDK5R1	cyclin dependent kinase 5 regulatory subunit 1
1021	CDK6	cyclin dependent kinase 6
1022	CDK7	cyclin dependent kinase 7
1026	CDKN1A	cyclin dependent kinase inhibitor 1A
1027	CDKN1B	cyclin dependent kinase inhibitor 1B
1029	CDKN2A	cyclin dependent kinase inhibitor 2A
1050	CEBPA	CCAAT/enhancer binding protein alpha
1052	CEBPD	CCAAT/enhancer binding protein delta
10153	CEBPZ	CCAAT/enhancer binding protein zeta
1062	CENPE	centromere protein E
9702	CEP57	centrosomal protein 57
64781	CERK	ceramide kinase
1070	CETN3	centrin 3
8837	CFLAR	CASP8 and FADD like apoptosis regulator
10668	CGRRF1	cell growth regulator with ring finger domain 1
79094	CHAC1	ChaC glutathione specific gamma-glutamylcyclotransferase 1
1111	CHEK1	checkpoint kinase 1
11200	CHEK2	checkpoint kinase 2
10523	CHERP	calcium homeostasis endoplasmic reticulum protein
26511	CHIC2	cysteine rich hydrophobic domain 2
29082	CHMP4A	charged multivesicular body protein 4A
79643	CHMP6	charged multivesicular body protein 6
1123	CHN1	chimerin 1
11261	CHP1	calcineurin like EF-hand protein 1
57019	CIAPIN1	cytokine induced apoptosis inhibitor 1
1153	CIRBP	cold inducible RNA binding protein
55847	CISD1	CDGSH iron sulfur domain 1
25932	CLIC4	chloride intracellular channel 4
10845	CLPX	caseinolytic mitochondrial matrix peptidase chaperone subunit
22883	CLSTN1	calsyntenin 1
1212	CLTB	clathrin light chain B
1213	CLTC	clathrin heavy chain
55748	CNDP2	CNDP dipeptidase 2 (metallopeptidase M20 family)
4850	CNOT4	CCR4-NOT transcription complex subunit 4
10695	CNPY3	canopy FGF signaling regulator 3
80347	COASY	Coenzyme A synthase
22796	COG2	component of oligomeric golgi complex 2
25839	COG4	component of oligomeric golgi complex 4
91949	COG7	component of oligomeric golgi complex 7
1277	COL1A1	collagen type I alpha 1 chain
1282	COL4A1	collagen type IV alpha 1 chain
9276	COPB2	coatomer protein complex subunit beta 2
50813	COPS7A	COP9 signalosome subunit 7A
56997	COQ8A	coenzyme Q8A
11151	CORO1A	coronin 1A
8895	CPNE3	copine 3
10898	CPSF4	cleavage and polyadenylation specific factor 4
1385	CREB1	cAMP responsive element binding protein 1
8804	CREG1	cellular repressor of E1A stimulated genes 1
79174	CRELD2	cysteine rich with EGF like domains 2
1398	CRK	CRK proto-oncogene, adaptor protein
1399	CRKL	CRK like proto-oncogene, adaptor protein
10491	CRTAP	cartilage associated protein
1429	CRYZ	crystallin zeta
1445	CSK	CSK, non-receptor tyrosine kinase
1452	CSNK1A1	casein kinase 1 alpha 1
1454	CSNK1E	casein kinase 1 epsilon
1459	CSNK2A2	casein kinase 2 alpha 2
1465	CSRP1	cysteine and glycine rich protein 1
8727	CTNNAL1	catenin alpha like 1
1500	CTNND1	catenin delta 1
1509	CTSD	cathepsin D
1514	CTSL	cathepsin L
2017	CTTN	cortactin
2920	CXCL2	C-X-C motif chemokine ligand 2
7852	CXCR4	C-X-C motif chemokine receptor 4
1534	CYB561	cytochrome b561
54205	CYCS	cytochrome c, somatic
9267	CYTH1	cytohesin 1
1605	DAG1	dystroglycan 1
1616	DAXX	death domain associated protein
1633	DCK	deoxycytidine kinase
1635	DCTD	dCMP deaminase
23142	DCUN1D4	defective in cullin neddylation 1 domain containing 4
1643	DDB2	damage specific DNA binding protein 2
54541	DDIT4	DNA damage inducible transcript 4
780	DDR1	discoidin domain receptor tyrosine kinase 1
1662	DDX10	DEAD-box helicase 10
11325	DDX42	DEAD-box helicase 42
1666	DECR1	2,4-dienoyl-CoA reductase 1
79961	DENND2D	DENN domain containing 2D
51071	DERA	deoxyribose-phosphate aldolase
1676	DFFA	DNA fragmentation factor subunit alpha
1677	DFFB	DNA fragmentation factor subunit beta
79947	DHDDS	dehydrodolichyl diphosphate synthase subunit
51635	DHRS7	dehydrogenase/reductase 7
54505	DHX29	DExH-box helicase 29
1738	DLD	dihydrolipoamide dehydrogenase
9988	DMTF1	cyclin D binding myb like transcription factor 1
9093	DNAJA3	DnaJ heat shock protein family (Hsp40) member A3
3337	DNAJB1	DnaJ heat shock protein family (Hsp40) member B1
3300	DNAJB2	DnaJ heat shock protein family (Hsp40) member B2
10049	DNAJB6	DnaJ heat shock protein family (Hsp40) member B6
29103	DNAJC15	DnaJ heat shock protein family (Hsp40) member C15
1759	DNM1	dynamin 1
10059	DNM1L	dynamin 1 like
1786	DNMT1	DNA methyltransferase 1
1788	DNMT3A	DNA methyltransferase 3 alpha
30836	DNTTIP2	deoxynucleotidyltransferase terminal interacting protein 2
1802	DPH2	DPH2 homolog
10589	DRAP1	DR1 associated protein 1
1829	DSG2	desmoglein 2
8446	DUSP11	dual specificity phosphatase 11
11072	DUSP14	dual specificity phosphatase 14
56940	DUSP22	dual specificity phosphatase 22
1845	DUSP3	dual specificity phosphatase 3
1846	DUSP4	dual specificity phosphatase 4
1848	DUSP6	dual specificity phosphatase 6
6990	DYNLT3	dynein light chain Tctex-type 3
8444	DYRK3	dual specificity tyrosine phosphorylation regulated kinase 3
1870	E2F2	E2F transcription factor 2
55837	EAPP	E2F associated phosphoprotein
10969	EBNA1BP2	EBNA1 binding protein 2
10682	EBP	emopamil binding protein (sterol isomerase)
11319	ECD	ecdysoneless cell cycle regulator
1891	ECH1	enoyl-CoA hydratase 1
9695	EDEM1	ER degradation enhancing alpha-mannosidase like protein 1
1906	EDN1	endothelin 1
8726	EED	embryonic ectoderm development
9813	EFCAB14	EF-hand calcium binding domain 14
1950	EGF	epidermal growth factor
1956	EGFR	epidermal growth factor receptor
1958	EGR1	early growth response 1
1978	EIF4EBP1	eukaryotic translation initiation factor 4E binding protein 1
1981	EIF4G1	eukaryotic translation initiation factor 4 gamma 1
1983	EIF5	eukaryotic translation initiation factor 5
60528	ELAC2	elaC ribonuclease Z 2
1994	ELAVL1	ELAV like RNA binding protein 1
79071	ELOVL6	ELOVL fatty acid elongase 6
256364	EML3	echinoderm microtubule associated protein like 3
58478	ENOPH1	enolase-phosphatase 1
55556	ENOSF1	enolase superfamily member 1
2037	EPB41L2	erythrocyte membrane protein band 4.1 like 2
2042	EPHA3	EPH receptor A3
2048	EPHB2	EPH receptor B2
22905	EPN2	epsin 2
2058	EPRS	glutamyl-prolyl-tRNA synthetase
2064	ERBB2	erb-b2 receptor tyrosine kinase 2
2065	ERBB3	erb-b2 receptor tyrosine kinase 3
30001	ERO1A	endoplasmic reticulum oxidoreductase 1 alpha
2109	ETFB	electron transfer flavoprotein beta subunit
2113	ETS1	ETS proto-oncogene 1, transcription factor
2115	ETV1	ETS variant 1
51466	EVL	Enah/Vasp-like
54512	EXOSC4	exosome component 4
2131	EXT1	exostosin glycosyltransferase 1
2146	EZH2	enhancer of zeste 2 polycomb repressive complex 2 subunit
2184	FAH	fumarylacetoacetate hydrolase
55179	FAIM	Fas apoptotic inhibitory molecule
9917	FAM20B	FAM20B, glycosaminoglycan xylosylkinase
79850	FAM57A	family with sequence similarity 57 member A
388650	FAM69A	family with sequence similarity 69 member A
355	FAS	Fas cell surface death receptor
60493	FASTKD5	FAST kinase domains 5
2195	FAT1	FAT atypical cadherin 1
54850	FBXL12	F-box and leucine rich repeat protein 12
80204	FBXO11	F-box protein 11
23014	FBXO21	F-box protein 21
25793	FBXO7	F-box protein 7
23149	FCHO1	FCH domain only 1
2222	FDFT1	farnesyl-diphosphate farnesyltransferase 1
9637	FEZ2	fasciculation and elongation protein zeta 2
2263	FGFR2	fibroblast growth factor receptor 2
2264	FGFR4	fibroblast growth factor receptor 4
2274	FHL2	four and a half LIM domains 2
51024	FIS1	fission, mitochondrial 1
55033	FKBP14	FK506 binding protein 14
2288	FKBP4	FK506 binding protein 4
2353	FOS	Fos proto-oncogene, AP-1 transcription factor subunit
8061	FOSL1	FOS like 1, AP-1 transcription factor subunit
22887	FOXJ3	forkhead box J3
2309	FOXO3	forkhead box O3
4303	FOXO4	forkhead box O4
2356	FPGS	folylpolyglutamate synthase
10818	FRS2	fibroblast growth factor receptor substrate 2
79187	FSD1	fibronectin type III and SPRY domain containing 1
2523	FUT1	fucosyltransferase 1 (H blood group)
2534	FYN	FYN proto-oncogene, Src family tyrosine kinase
8321	FZD1	frizzled class receptor 1
8324	FZD7	frizzled class receptor 7
10146	G3BP1	G3BP stress granule assembly factor 1
2548	GAA	glucosidase alpha, acid
2553	GABPB1	GA binding protein transcription factor beta subunit 1
1647	GADD45A	growth arrest and DNA damage inducible alpha
4616	GADD45B	growth arrest and DNA damage inducible beta
2582	GALE	UDP-galactose-4-epimerase
2597	GAPDH	glyceraldehyde-3-phosphate dehydrogenase
2624	GATA2	GATA binding protein 2
2625	GATA3	GATA binding protein 3
81544	GDPD5	glycerophosphodiester phosphodiesterase domain containing 5
54438	GFOD1	glucose-fructose oxidoreductase domain containing 1
2673	GFPT1	glutamine--fructose-6-phosphate transaminase 1
2690	GHR	growth hormone receptor
2736	GLI2	GLI family zinc finger 2
51031	GLOD4	glyoxalase domain containing 4
2745	GLRX	glutaredoxin
51053	GMNN	geminin, DNA replication inhibitor
2767	GNA11	G protein subunit alpha 11
2769	GNA15	G protein subunit alpha 15
2770	GNAI1	G protein subunit alpha i1
2771	GNAI2	G protein subunit alpha i2
2778	GNAS	GNAS complex locus
10681	GNB5	G protein subunit beta 5
10007	GNPDA1	glucosamine-6-phosphate deaminase 1
51026	GOLT1B	golgi transport 1B
23131	GPATCH8	G-patch domain containing 8
2817	GPC1	glypican 1
2852	GPER1	G protein-coupled estrogen receptor 1
2887	GRB10	growth factor receptor bound protein 10
2886	GRB7	growth factor receptor bound protein 7
2896	GRN	granulin precursor
83743	GRWD1	glutamate rich WD repeat containing 1
2946	GSTM2	glutathione S-transferase mu 2
2954	GSTZ1	glutathione S-transferase zeta 1
2958	GTF2A2	general transcription factor IIA subunit 2
2961	GTF2E2	general transcription factor IIE subunit 2
29083	GTPBP8	GTP binding protein 8 (putative)
94239	H2AFV	H2A histone family member V
51495	HACD3	3-hydroxyacyl-CoA dehydratase 3
3033	HADH	hydroxyacyl-CoA dehydrogenase
8520	HAT1	histone acetyltransferase 1
3066	HDAC2	histone deacetylase 2
10013	HDAC6	histone deacetylase 6
50810	HDGFRP3	hepatoma-derived growth factor, related protein 3
55127	HEATR1	HEAT repeat containing 1
50865	HEBP1	heme binding protein 1
55008	HERC6	HECT and RLD domain containing E3 ubiquitin protein ligase family member 6
9709	HERPUD1	homocysteine inducible ER protein with ubiquitin like domain 1
3280	HES1	hes family bHLH transcription factor 1
3091	HIF1A	hypoxia inducible factor 1 alpha subunit
85236	HIST1H2BK	histone cluster 1 H2B family member k
8349	HIST2H2BE	histone cluster 2 H2B family member e
3098	HK1	hexokinase 1
3108	HLA-DMA	major histocompatibility complex, class II, DM alpha
3122	HLA-DRA	major histocompatibility complex, class II, DR alpha
10362	HMG20B	high mobility group 20B
8091	HMGA2	high mobility group AT-hook 2
3156	HMGCR	3-hydroxy-3-methylglutaryl-CoA reductase
3157	HMGCS1	3-hydroxy-3-methylglutaryl-CoA synthase 1
3162	HMOX1	heme oxygenase 1
90861	HN1L	hematological and neurological expressed 1 like
9455	HOMER2	homer scaffolding protein 2
29911	HOOK2	hook microtubule tethering protein 2
3206	HOXA10	homeobox A10
3202	HOXA5	homeobox A5
3251	HPRT1	hypoxanthine phosphoribosyltransferase 1
9653	HS2ST1	heparan sulfate 2-O-sulfotransferase 1
3028	HSD17B10	hydroxysteroid 17-beta dehydrogenase 10
51170	HSD17B11	hydroxysteroid 17-beta dehydrogenase 11
3303	HSPA1A	heat shock protein family A (Hsp70) member 1A
3308	HSPA4	heat shock protein family A (Hsp70) member 4
3312	HSPA8	heat shock protein family A (Hsp70) member 8
3315	HSPB1	heat shock protein family B (small) member 1
3329	HSPD1	heat shock protein family D (Hsp60) member 1
27336	HTATSF1	HIV-1 Tat specific factor 1
5654	HTRA1	HtrA serine peptidase 1
10525	HYOU1	hypoxia up-regulated 1
55699	IARS2	isoleucyl-tRNA synthetase 2, mitochondrial
3383	ICAM1	intercellular adhesion molecule 1
3385	ICAM3	intercellular adhesion molecule 3
23463	ICMT	isoprenylcysteine carboxyl methyltransferase
3398	ID2	inhibitor of DNA binding 2, HLH protein
3416	IDE	insulin degrading enzyme
8870	IER3	immediate early response 3
3454	IFNAR1	interferon alpha and beta receptor subunit 1
7866	IFRD2	interferon related developmental regulator 2
3480	IGF1R	insulin like growth factor 1 receptor
10644	IGF2BP2	insulin like growth factor 2 mRNA binding protein 2
3482	IGF2R	insulin like growth factor 2 receptor
3486	IGFBP3	insulin like growth factor binding protein 3
3508	IGHMBP2	immunoglobulin mu binding protein 2
8518	IKBKAP	inhibitor of kappa light polypeptide gene enhancer in B-cells, kinase complex-associated protein
3551	IKBKB	inhibitor of nuclear factor kappa B kinase subunit beta
9641	IKBKE	inhibitor of nuclear factor kappa B kinase subunit epsilon
10320	IKZF1	IKAROS family zinc finger 1
3597	IL13RA1	interleukin 13 receptor subunit alpha 1
3553	IL1B	interleukin 1 beta
3566	IL4R	interleukin 4 receptor
3611	ILK	integrin linked kinase
3628	INPP1	inositol polyphosphate-1-phosphatase
8821	INPP4B	inositol polyphosphate-4-phosphatase type II B
3638	INSIG1	insulin induced gene 1
65123	INTS3	integrator complex subunit 3
9670	IPO13	importin 13
8826	IQGAP1	IQ motif containing GTPase activating protein 1
51015	ISOC1	isochorismatase domain containing 1
81533	ITFG1	integrin alpha FG-GAP repeat containing 1
3682	ITGAE	integrin subunit alpha E
9270	ITGB1BP1	integrin subunit beta 1 binding protein 1
3693	ITGB5	integrin subunit beta 5
23338	JADE2	jade family PHD finger 2
23210	JMJD6	arginine demethylase and lysine hydroxylase
3725	JUN	Jun proto-oncogene, AP-1 transcription factor subunit
7994	KAT6A	lysine acetyltransferase 6A
23522	KAT6B	lysine acetyltransferase 6B
3775	KCNK1	potassium two pore domain channel subfamily K member 1
54442	KCTD5	potassium channel tetramerization domain containing 5
11014	KDELR2	KDEL endoplasmic reticulum protein retention receptor 2
55818	KDM3A	lysine demethylase 3A
5927	KDM5A	lysine demethylase 5A
10765	KDM5B	lysine demethylase 5B
9817	KEAP1	kelch like ECH associated protein 1
9703	KIAA0100	KIAA0100
9710	KIAA0355	KIAA0355
9851	KIAA0753	KIAA0753
22889	KIAA0907	KIAA0907
9928	KIF14	kinesin family member 14
26128	KIF1BP	KIF1 binding protein
10112	KIF20A	kinesin family member 20A
11004	KIF2C	kinesin family member 2C
3800	KIF5C	kinesin family member 5C
3815	KIT	KIT proto-oncogene receptor tyrosine kinase
23588	KLHDC2	kelch domain containing 2
9903	KLHL21	kelch like family member 21
55958	KLHL9	kelch like family member 9
3895	KTN1	kinectin 1
8270	LAGE3	L antigen family member 3
3909	LAMA3	laminin subunit alpha 3
51056	LAP3	leucine aminopeptidase 3
3930	LBR	lamin B receptor
3964	LGALS8	galectin 8
5641	LGMN	legumain
3978	LIG1	DNA ligase 1
3988	LIPA	lipase A, lysosomal acid type
4016	LOXL1	lysyl oxidase like 1
9170	LPAR2	lysophosphatidic acid receptor 2
9926	LPGAT1	lysophosphatidylglycerol acyltransferase 1
26020	LRP10	LDL receptor related protein 10
4043	LRPAP1	LDL receptor related protein associated protein 1
10489	LRRC41	leucine rich repeat containing 41
23658	LSM5	LSM5 homolog, U6 small nuclear RNA and mRNA degradation associated
11157	LSM6	LSM6 homolog, U6 small nuclear RNA and mRNA degradation associated
51599	LSR	lipolysis stimulated lipoprotein receptor
4067	LYN	LYN proto-oncogene, Src family tyrosine kinase
10434	LYPLA1	lysophospholipase I
57149	LYRM1	LYR motif containing 1
23499	MACF1	microtubule-actin crosslinking factor 1
10892	MALT1	MALT1 paracaspase
10046	MAMLD1	mastermind like domain containing 1
4125	MAN2B1	mannosidase alpha class 2B member 1
5607	MAP2K5	mitogen-activated protein kinase kinase 5
4216	MAP3K4	mitogen-activated protein kinase kinase kinase 4
9448	MAP4K4	mitogen-activated protein kinase kinase kinase kinase 4
9053	MAP7	microtubule associated protein 7
5603	MAPK13	mitogen-activated protein kinase 13
93487	MAPK1IP1L	mitogen-activated protein kinase 1 interacting protein 1 like
5601	MAPK9	mitogen-activated protein kinase 9
9261	MAPKAPK2	mitogen-activated protein kinase-activated protein kinase 2
7867	MAPKAPK3	mitogen-activated protein kinase-activated protein kinase 3
8550	MAPKAPK5	mitogen-activated protein kinase-activated protein kinase 5
23139	MAST2	microtubule associated serine/threonine kinase 2
4144	MAT2A	methionine adenosyltransferase 2A
4154	MBNL1	muscleblind like splicing regulator 1
10150	MBNL2	muscleblind like splicing regulator 2
79143	MBOAT7	membrane bound O-acyltransferase domain containing 7
8720	MBTPS1	membrane bound transcription factor peptidase, site 1
4172	MCM3	minichromosome maintenance complex component 3
57192	MCOLN1	mucolipin 1
63933	MCUR1	mitochondrial calcium uniporter regulator 1
4200	ME2	malic enzyme 2
4208	MEF2C	myocyte enhancer factor 2C
9833	MELK	maternal embryonic leucine zipper kinase
4232	MEST	mesoderm specific transcript
79006	METRN	meteorin, glial cell differentiation regulator
10227	MFSD10	major facilitator superfamily domain containing 10
85377	MICALL1	MICAL like 1
4282	MIF	macrophage migration inhibitory factor (glycosylation-inhibiting factor)
55793	MINDY1	MINDY lysine 48 deubiquitinase 1
8569	MKNK1	MAP kinase interacting serine/threonine kinase 1
9761	MLEC	malectin
10962	MLLT11	myeloid/lymphoid or mixed-lineage leukemia; translocated to, 11
4312	MMP1	matrix metallopeptidase 1
4313	MMP2	matrix metallopeptidase 2
4331	MNAT1	MNAT1, CDK activating kinase assembly factor
5891	MOK	MOK protein kinase
25874	MPC2	mitochondrial pyruvate carrier 2
9019	MPZL1	myelin protein zero like 1
6182	MRPL12	mitochondrial ribosomal protein L12
9801	MRPL19	mitochondrial ribosomal protein L19
51021	MRPS16	mitochondrial ribosomal protein S16
51116	MRPS2	mitochondrial ribosomal protein S2
2956	MSH6	mutS homolog 6
4482	MSRA	methionine sulfoxide reductase A
9112	MTA1	metastasis associated 1
51001	MTERF3	mitochondrial transcription termination factor 3
22823	MTF2	metal response element binding transcription factor 2
9650	MTFR1	mitochondrial fission regulator 1
10797	MTHFD2	methylenetetrahydrofolate dehydrogenase (NADP+ dependent) 2, methenyltetrahydrofolate cyclohydrolase
4582	MUC1	mucin 1, cell surface associated
9961	MVP	major vault protein
4605	MYBL2	MYB proto-oncogene like 2
4609	MYC	v-myc avian myelocytomatosis viral oncogene homolog
26292	MYCBP	MYC binding protein
23077	MYCBP2	MYC binding protein 2, E3 ubiquitin protein ligase
10398	MYL9	myosin light chain 9
4638	MYLK	myosin light chain kinase
4651	MYO10	myosin X
64428	NARFL	nuclear prelamin A recognition factor like
9918	NCAPD2	non-SMC condensin I complex subunit D2
4690	NCK1	NCK adaptor protein 1
8440	NCK2	NCK adaptor protein 2
8202	NCOA3	nuclear receptor coactivator 3
29937	NENF	neudesin neurotrophic factor
10276	NET1	neuroepithelial cell transforming 1
4775	NFATC3	nuclear factor of activated T-cells 3
4776	NFATC4	nuclear factor of activated T-cells 4
4780	NFE2L2	nuclear factor, erythroid 2 like 2
4783	NFIL3	nuclear factor, interleukin 3 regulated
4791	NFKB2	nuclear factor kappa B subunit 2
4792	NFKBIA	NFKB inhibitor alpha
4793	NFKBIB	NFKB inhibitor beta
4794	NFKBIE	NFKB inhibitor epsilon
51335	NGRN	neugrin, neurite outgrowth associated
8508	NIPSNAP1	nipsnap homolog 1
11188	NISCH	nischarin
4817	NIT1	nitrilase 1
4836	NMT1	N-myristoyltransferase 1
23530	NNT	nicotinamide nucleotide transhydrogenase
8996	NOL3	nucleolar protein 3
9221	NOLC1	nucleolar and coiled-body phosphoprotein 1
4846	NOS3	nitric oxide synthase 3
51070	NOSIP	nitric oxide synthase interacting protein
4851	NOTCH1	notch 1
4864	NPC1	NPC intracellular cholesterol transporter 1
56654	NPDC1	neural proliferation, differentiation and control 1
79716	NPEPL1	aminopeptidase-like 1
10641	NPRL2	NPR2-like, GATOR1 complex subunit
7376	NR1H2	nuclear receptor subfamily 1 group H member 2
2063	NR2F6	nuclear receptor subfamily 2 group F member 6
2908	NR3C1	nuclear receptor subfamily 3 group C member 1
4893	NRAS	neuroblastoma RAS viral oncogene homolog
8204	NRIP1	nuclear receptor interacting protein 1
50814	NSDHL	NAD(P) dependent steroid dehydrogenase-like
64943	NT5DC2	5-nucleotidase domain containing 2
4925	NUCB2	nucleobindin 2
23386	NUDCD3	NudC domain containing 3
53343	NUDT9	nudix hydrolase 9
55746	NUP133	nucleoporin 133
23636	NUP62	nucleoporin 62
79902	NUP85	nucleoporin 85
4927	NUP88	nucleoporin 88
9688	NUP93	nucleoporin 93
51203	NUSAP1	nucleolar and spindle associated protein 1
4931	NVL	nuclear VCP-like
4998	ORC1	origin recognition complex subunit 1
5018	OXA1L	OXA1L, mitochondrial inner membrane protein
5019	OXCT1	3-oxoacid CoA-transferase 1
9943	OXSR1	oxidative stress responsive 1
8974	P4HA2	prolyl 4-hydroxylase subunit alpha 2
54681	P4HTM	prolyl 4-hydroxylase, transmembrane
29763	PACSIN3	protein kinase C and casein kinase substrate in neurons 3
54623	PAF1	PAF1 homolog, Paf1/RNA polymerase II complex component
5048	PAFAH1B1	platelet activating factor acetylhydrolase 1b regulatory subunit 1
5050	PAFAH1B3	platelet activating factor acetylhydrolase 1b catalytic subunit 3
10606	PAICS	phosphoribosylaminoimidazole carboxylase and phosphoribosylaminoimidazolesuccinocarboxamide synthase
5058	PAK1	p21 (RAC1) activated kinase 1
10298	PAK4	p21 (RAC1) activated kinase 4
56924	PAK6	p21 (RAC1) activated kinase 6
9924	PAN2	PAN2 poly(A) specific ribonuclease subunit
11044	PAPD7	poly(A) RNA polymerase D7, non-canonical
142	PARP1	poly(ADP-ribose) polymerase 1
10038	PARP2	poly(ADP-ribose) polymerase 2
7849	PAX8	paired box 8
5092	PCBD1	pterin-4 alpha-carbinolamine dehydratase 1
5096	PCCB	propionyl-CoA carboxylase beta subunit
5106	PCK2	phosphoenolpyruvate carboxykinase 2, mitochondrial
5108	PCM1	pericentriolar material 1
5110	PCMT1	protein-L-isoaspartate (D-aspartate) O-methyltransferase
5111	PCNA	proliferating cell nuclear antigen
5154	PDGFA	platelet derived growth factor subunit A
8050	PDHX	pyruvate dehydrogenase complex component X
10954	PDIA5	protein disulfide isomerase family A member 5
9124	PDLIM1	PDZ and LIM domain 1
23244	PDS5A	PDS5 cohesin associated factor A
55825	PECR	peroxisomal trans-2-enoyl-CoA reductase
8800	PEX11A	peroxisomal biogenesis factor 11 alpha
5211	PFKL	phosphofructokinase, liver type
5223	PGAM1	phosphoglycerate mutase 1
5236	PGM1	phosphoglucomutase 1
10857	PGRMC1	progesterone receptor membrane component 1
26227	PHGDH	phosphoglycerate dehydrogenase
5255	PHKA1	phosphorylase kinase regulatory subunit alpha 1
5257	PHKB	phosphorylase kinase regulatory subunit beta
5261	PHKG2	phosphorylase kinase catalytic subunit gamma 2
9488	PIGB	phosphatidylinositol glycan anchor biosynthesis class B
55011	PIH1D1	PIH1 domain containing 1
5287	PIK3C2B	phosphatidylinositol-4-phosphate 3-kinase catalytic subunit type 2 beta
5289	PIK3C3	phosphatidylinositol 3-kinase catalytic subunit type 3
5290	PIK3CA	phosphatidylinositol-4,5-bisphosphate 3-kinase catalytic subunit alpha
8503	PIK3R3	phosphoinositide-3-kinase regulatory subunit 3
30849	PIK3R4	phosphoinositide-3-kinase regulatory subunit 4
5300	PIN1	peptidylprolyl cis/trans isomerase, NIMA-interacting 1
8396	PIP4K2B	phosphatidylinositol-5-phosphate 4-kinase type 2 beta
11142	PKIG	cAMP-dependent protein kinase inhibitor gamma
23659	PLA2G15	phospholipase A2 group XV
5321	PLA2G4A	phospholipase A2 group IVA
5331	PLCB3	phospholipase C beta 3
55111	PLEKHJ1	pleckstrin homology domain containing J1
9842	PLEKHM1	pleckstrin homology and RUN domain containing M1
5347	PLK1	polo like kinase 1
8985	PLOD3	procollagen-lysine,2-oxoglutarate 5-dioxygenase 3
5355	PLP2	proteolipid protein 2
5357	PLS1	plastin 1
5359	PLSCR1	phospholipid scramblase 1
57048	PLSCR3	phospholipid scramblase 3
5366	PMAIP1	phorbol-12-myristate-13-acetate-induced protein 1
5373	PMM2	phosphomannomutase 2
11284	PNKP	polynucleotide kinase 3-phosphatase
4860	PNP	purine nucleoside phosphorylase
5423	POLB	DNA polymerase beta
57804	POLD4	DNA polymerase delta 4, accessory subunit
5427	POLE2	DNA polymerase epsilon 2, accessory subunit
11232	POLG2	DNA polymerase gamma 2, accessory subunit
9533	POLR1C	RNA polymerase I subunit C
5438	POLR2I	RNA polymerase II subunit I
5440	POLR2K	RNA polymerase II subunit K
10775	POP4	POP4 homolog, ribonuclease P/MRP subunit
5467	PPARD	peroxisome proliferator activated receptor delta
5468	PPARG	peroxisome proliferator activated receptor gamma
5480	PPIC	peptidylprolyl isomerase C
10450	PPIE	peptidylprolyl isomerase E
5498	PPOX	protoporphyrinogen oxidase
23368	PPP1R13B	protein phosphatase 1 regulatory subunit 13B
55012	PPP2R3C	protein phosphatase 2 regulatory subunit Bgamma
5525	PPP2R5A	protein phosphatase 2 regulatory subunit Balpha
5529	PPP2R5E	protein phosphatase 2 regulatory subunit Bepsilon
11230	PRAF2	PRA1 domain family member 2
5547	PRCP	prolylcarboxypeptidase
5566	PRKACA	protein kinase cAMP-activated catalytic subunit alpha
51422	PRKAG2	protein kinase AMP-activated non-catalytic subunit gamma 2
5580	PRKCD	protein kinase C delta
5583	PRKCH	protein kinase C eta
5588	PRKCQ	protein kinase C theta
5613	PRKX	protein kinase, X-linked
5627	PROS1	protein S (alpha)
9128	PRPF4	pre-mRNA processing factor 4
79170	PRR15L	proline rich 15 like
80758	PRR7	proline rich 7, synaptic
11098	PRSS23	protease, serine 23
58497	PRUNE1	prune exopolyphosphatase 1
11168	PSIP1	PC4 and SFRS1 interacting protein 1
5699	PSMB10	proteasome subunit beta 10
5696	PSMB8	proteasome subunit beta 8
5716	PSMD10	proteasome 26S subunit, non-ATPase 10
5708	PSMD2	proteasome 26S subunit, non-ATPase 2
5710	PSMD4	proteasome 26S subunit, non-ATPase 4
5715	PSMD9	proteasome 26S subunit, non-ATPase 9
5720	PSME1	proteasome activator subunit 1
5721	PSME2	proteasome activator subunit 2
9491	PSMF1	proteasome inhibitor subunit 1
8624	PSMG1	proteasome assembly chaperone 1
84722	PSRC1	proline and serine rich coiled-coil 1
5743	PTGS2	prostaglandin-endoperoxide synthase 2
5747	PTK2	protein tyrosine kinase 2
2185	PTK2B	protein tyrosine kinase 2 beta
5770	PTPN1	protein tyrosine phosphatase, non-receptor type 1
5782	PTPN12	protein tyrosine phosphatase, non-receptor type 12
5777	PTPN6	protein tyrosine phosphatase, non-receptor type 6
5788	PTPRC	protein tyrosine phosphatase, receptor type C
5792	PTPRF	protein tyrosine phosphatase, receptor type F
5796	PTPRK	protein tyrosine phosphatase, receptor type K
22827	PUF60	poly(U) binding splicing factor 60
11137	PWP1	PWP1 homolog, endonuclein
5829	PXN	paxillin
5831	PYCR1	pyrroline-5-carboxylate reductase 1
5836	PYGL	glycogen phosphorylase L
22841	RAB11FIP2	RAB11 family interacting protein 2
23011	RAB21	RAB21, member RAS oncogene family
5873	RAB27A	RAB27A, member RAS oncogene family
11031	RAB31	RAB31, member RAS oncogene family
5867	RAB4A	RAB4A, member RAS oncogene family
5880	RAC2	ras-related C3 botulinum toxin substrate 2 (rho family, small GTP binding protein Rac2)
5889	RAD51C	RAD51 paralog C
5883	RAD9A	RAD9 checkpoint clamp component A
8480	RAE1	ribonucleic acid export 1
26064	RAI14	retinoic acid induced 14
5898	RALA	RAS like proto-oncogene A
5899	RALB	RAS like proto-oncogene B
5900	RALGDS	ral guanine nucleotide dissociation stimulator
5909	RAP1GAP	RAP1 GTPase activating protein
5921	RASA1	RAS p21 protein activator 1
5925	RB1	RB transcriptional corepressor 1
64080	RBKS	ribokinase
29890	RBM15B	RNA binding motif protein 15B
23029	RBM34	RNA binding motif protein 34
10180	RBM6	RNA binding motif protein 6
7905	REEP5	receptor accessory protein 5
5971	RELB	RELB proto-oncogene, NF-kB subunit
5982	RFC2	replication factor C subunit 2
5985	RFC5	replication factor C subunit 5
5986	RFNG	RFNG O-fucosylpeptide 3-beta-N-acetylglucosaminyltransferase
5993	RFX5	regulatory factor X5
5997	RGS2	regulator of G-protein signaling 2
6009	RHEB	Ras homolog enriched in brain
387	RHOA	ras homolog family member A
26001	RNF167	ring finger protein 167
6050	RNH1	ribonuclease/angiogenin inhibitor 1
8731	RNMT	RNA guanine-7 methyltransferase
10921	RNPS1	RNA binding protein with serine rich domain 1
6117	RPA1	replication protein A1
6118	RPA2	replication protein A2
6119	RPA3	replication protein A3
22934	RPIA	ribose 5-phosphate isomerase A
116832	RPL39L	ribosomal protein L39 like
6184	RPN1	ribophorin I
10557	RPP38	ribonuclease P/MRP subunit p38
6193	RPS5	ribosomal protein S5
6194	RPS6	ribosomal protein S6
6195	RPS6KA1	ribosomal protein S6 kinase A1
10670	RRAGA	Ras related GTP binding A
23223	RRP12	ribosomal RNA processing 12 homolog
23076	RRP1B	ribosomal RNA processing 1B
23378	RRP8	ribosomal RNA processing 8, methyltransferase, homolog (yeast)
23212	RRS1	ribosome biogenesis regulator homolog
6251	RSU1	Ras suppressor protein 1
6253	RTN2	reticulon 2
8607	RUVBL1	RuvB like AAA ATPase 1
6284	S100A13	S100 calcium binding protein A13
6275	S100A4	S100 calcium binding protein A4
22908	SACM1L	SAC1 suppressor of actin mutations 1-like (yeast)
6304	SATB1	SATB homeobox 1
51282	SCAND1	SCAN domain containing 1
949	SCARB1	scavenger receptor class B member 1
51097	SCCPDH	saccharopine dehydrogenase (putative)
6342	SCP2	sterol carrier protein 2
9805	SCRN1	secernin 1
57147	SCYL3	SCY1 like pseudokinase 3
6390	SDHB	succinate dehydrogenase complex iron sulfur subunit B
26054	SENP6	SUMO1/sentrin specific peptidase 6
5054	SERPINE1	serpin family E member 1
27244	SESN1	sestrin 1
2810	SFN	stratifin
6443	SGCB	sarcoglycan beta
9467	SH3BP5	SH3 domain binding protein 5
6461	SHB	SH2 domain containing adaptor protein B
6464	SHC1	SHC adaptor protein 1
23410	SIRT3	sirtuin 3
6499	SKIV2L	Ski2 like RNA helicase
6500	SKP1	S-phase kinase associated protein 1
4891	SLC11A2	solute carrier family 11 member 2
6509	SLC1A4	solute carrier family 1 member 4
10165	SLC25A13	solute carrier family 25 member 13
9016	SLC25A14	solute carrier family 25 member 14
291	SLC25A4	solute carrier family 25 member 4
91137	SLC25A46	solute carrier family 25 member 46
11000	SLC27A3	solute carrier family 27 member 3
11182	SLC2A6	solute carrier family 2 member 6
10559	SLC35A1	solute carrier family 35 member A1
23443	SLC35A3	solute carrier family 35 member A3
10237	SLC35B1	solute carrier family 35 member B1
54733	SLC35F2	solute carrier family 35 member F2
2542	SLC37A4	solute carrier family 37 member 4
8884	SLC5A6	solute carrier family 5 member 6
4088	SMAD3	SMAD family member 3
6597	SMARCA4	SWI/SNF related, matrix associated, actin dependent regulator of chromatin, subfamily a, member 4
6599	SMARCC1	SWI/SNF related, matrix associated, actin dependent regulator of chromatin subfamily c member 1
6603	SMARCD2	SWI/SNF related, matrix associated, actin dependent regulator of chromatin, subfamily d, member 2
8243	SMC1A	structural maintenance of chromosomes 1A
9126	SMC3	structural maintenance of chromosomes 3
10051	SMC4	structural maintenance of chromosomes 4
10285	SMNDC1	survival motor neuron domain containing 1
6616	SNAP25	synaptosome associated protein 25
6622	SNCA	synuclein alpha
29916	SNX11	sorting nexin 11
23161	SNX13	sorting nexin 13
58533	SNX6	sorting nexin 6
51375	SNX7	sorting nexin 7
8835	SOCS2	suppressor of cytokine signaling 2
10174	SORBS3	sorbin and SH3 domain containing 3
6657	SOX2	SRY-box 2
6659	SOX4	SRY-box 4
6676	SPAG4	sperm associated antigen 4
9552	SPAG7	sperm associated antigen 7
25803	SPDEF	SAM pointed domain containing ETS transcription factor
23013	SPEN	spen family transcriptional repressor
6696	SPP1	secreted phosphoprotein 1
6697	SPR	sepiapterin reductase (7,8-dihydrobiopterin:NADP+ oxidoreductase)
200734	SPRED2	sprouty related EVH1 domain containing 2
6709	SPTAN1	spectrin alpha, non-erythrocytic 1
9517	SPTLC2	serine palmitoyltransferase long chain base subunit 2
58472	SQRDL	sulfide quinone reductase-like (yeast)
8878	SQSTM1	sequestosome 1
6714	SRC	SRC proto-oncogene, non-receptor tyrosine kinase
23635	SSBP2	single stranded DNA binding protein 2
8869	ST3GAL5	ST3 beta-galactoside alpha-2,3-sialyltransferase 5
10610	ST6GALNAC2	ST6 N-acetylgalactosaminide alpha-2,6-sialyltransferase 2
7982	ST7	suppression of tumorigenicity 7
10617	STAMBP	STAM binding protein
55620	STAP2	signal transducing adaptor family member 2
6772	STAT1	signal transducer and activator of transcription 1
6774	STAT3	signal transducer and activator of transcription 3
6777	STAT5B	signal transducer and activator of transcription 5B
6793	STK10	serine/threonine kinase 10
10494	STK25	serine/threonine kinase 25
3925	STMN1	stathmin 1
10273	STUB1	STIP1 homology and U-box containing protein 1
6804	STX1A	syntaxin 1A
6810	STX4	syntaxin 4
6812	STXBP1	syntaxin binding protein 1
6813	STXBP2	syntaxin binding protein 2
6832	SUPV3L1	Suv3 like RNA helicase
6839	SUV39H1	suppressor of variegation 3-9 homolog 1
23512	SUZ12	SUZ12 polycomb repressive complex 2 subunit
6850	SYK	spleen associated tyrosine kinase
23224	SYNE2	spectrin repeat containing nuclear envelope protein 2
9143	SYNGR3	synaptogyrin 3
6856	SYPL1	synaptophysin like 1
6894	TARBP1	TAR (HIV-1) RNA binding protein 1
9797	TATDN2	TatD DNase domain containing 2
93594	TBC1D31	TBC1 domain family member 31
23061	TBC1D9B	TBC1 domain family member 9B
6908	TBP	TATA-box binding protein
9519	TBPL1	TATA-box binding protein like 1
6909	TBX2	T-box 2
6915	TBXA2R	thromboxane A2 receptor
6919	TCEA2	transcription elongation factor A2
79921	TCEAL4	transcription elongation factor A like 4
10915	TCERG1	transcription elongation regulator 1
10732	TCFL5	transcription factor like 5
6988	TCTA	T-cell leukemia translocation altered
79600	TCTN1	tectonic family member 1
54386	TERF2IP	TERF2 interacting protein
7015	TERT	telomerase reverse transcriptase
26136	TES	testin LIM domain protein
7016	TESK1	testis-specific kinase 1
54881	TEX10	testis expressed 10
7020	TFAP2A	transcription factor AP-2 alpha
7027	TFDP1	transcription factor Dp-1
7043	TGFB3	transforming growth factor beta 3
7048	TGFBR2	transforming growth factor beta receptor 2
57215	THAP11	THAP domain containing 11
7074	TIAM1	T-cell lymphoma invasion and metastasis 1
148022	TICAM1	toll like receptor adaptor molecule 1
8914	TIMELESS	timeless circadian clock
10245	TIMM17B	translocase of inner mitochondrial membrane 17B
29928	TIMM22	translocase of inner mitochondrial membrane 22
26520	TIMM9	translocase of inner mitochondrial membrane 9
7077	TIMP2	TIMP metallopeptidase inhibitor 2
25976	TIPARP	TCDD inducible poly(ADP-ribose) polymerase
7082	TJP1	tight junction protein 1
7088	TLE1	transducin like enhancer of split 1
11011	TLK2	tousled like kinase 2
7099	TLR4	toll like receptor 4
9375	TM9SF2	transmembrane 9 superfamily member 2
56889	TM9SF3	transmembrane 9 superfamily member 3
54499	TMCO1	transmembrane and coiled-coil domains 1
10972	TMED10	transmembrane p24 trafficking protein 10
79073	TMEM109	transmembrane protein 109
375346	TMEM110	transmembrane protein 110
23670	TMEM2	transmembrane protein 2
10329	TMEM5	transmembrane protein 5
23585	TMEM50A	transmembrane protein 50A
27346	TMEM97	transmembrane protein 97
27242	TNFRSF21	TNF receptor superfamily member 21
10318	TNIP1	TNFAIP3 interacting protein 1
10953	TOMM34	translocase of outer mitochondrial membrane 34
9868	TOMM70	translocase of outer mitochondrial membrane 70
7153	TOP2A	topoisomerase (DNA) II alpha
11073	TOPBP1	topoisomerase (DNA) II binding protein 1
1861	TOR1A	torsin family 1 member A
7157	TP53	tumor protein p53
7158	TP53BP1	tumor protein p53 binding protein 1
7159	TP53BP2	tumor protein p53 binding protein 2
7165	TPD52L2	tumor protein D52 like 2
7168	TPM1	tropomyosin 1 (alpha)
66008	TRAK2	trafficking kinesin protein 2
9697	TRAM2	translocation associated membrane protein 2
10131	TRAP1	TNF receptor associated protein 1
27095	TRAPPC3	trafficking protein particle complex 3
79090	TRAPPC6A	trafficking protein particle complex 6A
10221	TRIB1	tribbles pseudokinase 1
57761	TRIB3	tribbles pseudokinase 3
10206	TRIM13	tripartite motif containing 13
23321	TRIM2	tripartite motif containing 2
1831	TSC22D3	TSC22 domain family member 3
80746	TSEN2	tRNA splicing endonuclease subunit 2
25987	TSKU	tsukushi, small leucine rich proteoglycan
10099	TSPAN3	tetraspanin 3
7106	TSPAN4	tetraspanin 4
7105	TSPAN6	tetraspanin 6
7264	TSTA3	tissue specific transplantation antigen P35B
11344	TWF2	twinfilin actin binding protein 2
200081	TXLNA	taxilin alpha
10190	TXNDC9	thioredoxin domain containing 9
54957	TXNL4B	thioredoxin like 4B
7296	TXNRD1	thioredoxin reductase 1
7319	UBE2A	ubiquitin conjugating enzyme E2 A
11065	UBE2C	ubiquitin conjugating enzyme E2 C
51465	UBE2J1	ubiquitin conjugating enzyme E2 J1
9246	UBE2L6	ubiquitin conjugating enzyme E2 L6
89910	UBE3B	ubiquitin protein ligase E3B
9690	UBE3C	ubiquitin protein ligase E3C
29978	UBQLN2	ubiquilin 2
55148	UBR7	ubiquitin protein ligase E3 component n-recognin 7 (putative)
51569	UFM1	ubiquitin fold modifier 1
7358	UGDH	UDP-glucose 6-dehydrogenase
7398	USP1	ubiquitin specific peptidase 1
9097	USP14	ubiquitin specific peptidase 14
23326	USP22	ubiquitin specific peptidase 22
9712	USP6NL	USP6 N-terminal like
7874	USP7	ubiquitin specific peptidase 7
10813	UTP14A	UTP14A small subunit processome component
9217	VAPB	VAMP associated protein B and C
10493	VAT1	vesicle amine transport 1
10451	VAV3	vav guanine nucleotide exchange factor 3
7416	VDAC1	voltage dependent anion channel 1
9686	VGLL4	vestigial like family member 4
51160	VPS28	VPS28, ESCRT-I subunit
6944	VPS72	vacuolar protein sorting 72 homolog
10810	WASF3	WAS protein family member 3
23325	WASHC4	WASH complex subunit 4
9897	WASHC5	WASH complex subunit 5
80349	WDR61	WD repeat domain 61
23335	WDR7	WD repeat domain 7
23038	WDTC1	WD and tetratricopeptide repeats 1
7466	WFS1	wolframin ER transmembrane glycoprotein
147179	WIPF2	WAS/WASL interacting protein family member 2
7485	WRB	tryptophan rich basic protein
7494	XBP1	X-box binding protein 1
7511	XPNPEP1	X-prolyl aminopeptidase 1
23039	XPO7	exportin 7
10652	YKT6	YKT6 v-SNARE homolog (S. cerevisiae)
10730	YME1L1	YME1 like 1 ATPase
54915	YTHDF1	YTH N6-methyladenosine RNA binding protein 1
64429	ZDHHC6	zinc finger DHHC-type containing 6
7538	ZFP36	ZFP36 ring finger protein
57178	ZMIZ1	zinc finger MIZ-type containing 1
7750	ZMYM2	zinc finger MYM-type containing 2
7690	ZNF131	zinc finger protein 131
10782	ZNF274	zinc finger protein 274
24149	ZNF318	zinc finger protein 318
55893	ZNF395	zinc finger protein 395
26036	ZNF451	zinc finger protein 451
54807	ZNF586	zinc finger protein 586
51385	ZNF589	zinc finger protein 589
9183	ZW10	zw10 kinetochore protein
