# Supplementary material for: Integrated transcriptomic and neuroimaging brain model decodes biological mechanisms in aging and Alzheimer’s disease
Source: eLife. 2021 May 18;10:e62589. doi: 10.7554/eLife.62589 (PMC8131100; doi:10.7554/eLife.62589)
Supplement: Supplementary file 4. [file elife-62589-supp4.xlsx]

## Sheet: Sheet1
		Longitudinal biological factor alterations
		CBF		Aβ		Functional activity		Glucose metabolism		Grey matter density		Tau
		Healthy	AD	Healthy	AD	Healthy	AD	Healthy	AD	Healthy	AD	Healthy	AD
Gene-imaging interactions	CBF	0	17	5	34	3	28	2	19	0	13	3	31
	Aβ	0	74	4	40	4	20	0	19	1	15	2	17
	Functional activity	1	41	2	14	0	17	0	15	1	11	2	30
	Glucose metabolism	2	78	3	35	1	24	1	33	1	10	2	28
	Grey matter density	1	53	2	37	5	36	2	30	1	21	1	39
	Tau	1	10	4	17	3	15	0	9	0	10	8	53
	Total	5	273	20	177	16	140	5	125	4	80	18	198
